# Supplementary material for: Geographical Gradient of the eIF4E Alleles Conferring Resistance to Potyviruses in Pea (Pisum) Germplasm
Source: PLoS One. 2014 Mar 7;9(3):e90394. doi: 10.1371/journal.pone.0090394 (PMC3946452; doi:10.1371/journal.pone.0090394)
Supplement: Table S1 — List of studied accessions, divided by 7 studied germplasm collection with indicated accession number, name, origin and eIF4E variant. (XLSX) [file pone.0090394.s001.xlsx]

## Sheet: JIC
JIC number	eIF4E variant	Name	Origin
1788	A	P.SATIVUM-NEPAL	NEP
1709	A	MUMMY BICOLOUR	SUD
1712	A	MUMMY x MUMMY BICOL.	SUD
1713	A	GOLD.STRAW x MUMMY BICOL.	SUD
1841	A	CNPH 642-83 CV	Brasil
1787	A	P.SATIVUM-NEPAL	NEP
1790	A	P.SATIVUM-NEPAL	NEP
2019	A	P.SATIVUM-LADAKH	IND
1146	A	P.SATIVUM-RUSSIA	USR
1260	A	P.SATIVUM-INDIA	IND
1265	A	P.SATIVUM-INDIA	IND
1521	A	P.SATIVUM-HINDUKUSCH	AFG
1546	A	P.SATIVUM-ETHIOPIA	ETH
467	A	DWARF SUGAR	JPN
967	A	P.SATIVUM-ETHIOPIA	ETH
1060	A	CUNDINAMARCA-4	CLB
2643	A	P.SATIVUM-MALAWI	Africa
1532	A	P.SATIVUM-HINDUKUSCH	AFG
161	B	P.SATIVUM-ETHIOPIA	ETH
166	B	P.SATIVUM-ETHIOPIA	AFG
179	B	P.SATIVUM-ETHIOPIA	AFG
79	B	P.SATIVUM-AFGHANISTAN	ETH
186	B	WIRAIG	ESP
86	B	P.SATIVUM-AFGHANISTAN	ETH
93	B	P.SATIVUM-AFGHANISTAN	ETH
191	B	WIRAIG	SUD
196	B	P.SATIVUM-GEORGIA	SUD
252	B	P.SATIVUM-ETHIOPIA	KEN
261	B	P.ELATIUS	ISR
234	B	P.SATIVUM-KENYA	TUK
751	B	P.SATIVUM-AFGHANISTAN	GRC
849	B	P.ELATIUS	ETH
851	B	P.SATIVUM-ISRAEL	ISR
342	B	CEFALONIA	AFG
937	B	MISERISERI	UGA
691	B	SMALL BLACK PEA	ISR
950	B	P.ELATIUS	ISR
705	B	P.SATIVUM-AFGHANISTAN	AFG
960	B	P.SATIVUM-TURKEY	TUK
714	B	P.ELATIUS	ETH
1078	B	P.SATIVUM-TURKEY	ISR
1074	B	P.ELATIUS	GRC
1357	B	AFGHANISTAN CV	AFG
1370	B	P.SATIVUM-TURKEY	NEP
1118	B	KEERAU PEA	IND
1270	B	P.SATIVUM-INDIA	ETH
1485	B	P.SATIVUM-AFGHANISTAN	ETH
1346	B	P.SATIVUM-MONGOLIA	AFG
1522	B	P.SATIVUM-HINDUKUSCH	AFG
1543	B	P.SATIVUM-MONGOLIA	MON
1641	B	P.ABYSSINICUM	CHN
1544	B	P.SATIVUM-CHINA	ETH
1687	B	P.SATIVUM-ETHIOPIA	CHN
1556	B	P.ABYSSINICUM	CHN
1576	B	P.SATIVUM-CHINA	ETH
1704	B	P.JOMARDII	ETH
1578	B	P.SATIVUM-CHINA	ETH
1757	B	BATIUS	ETH
193	B	WIRAIG	SUD
195	B	AROUS EL SHOAG	SUD
236	B	P.SATIVUM-ETHIOPIA	ETH
202	B	THOMAS LAXTON ROGUE	EU
237	B	P.SATIVUM-ETHIOPIA	ETH
203	B	P.SATIVUM ASIATICUM GOV.	IND
238	B	P.SATIVUM-ETHIOPIA	ETH
239	B	P.SATIVUM-ETHIOPIA	ETH
240	B	P.SATIVUM-ETHIOPIA	ETH
206	B	P.SATIVUM IRCUTIANUM GOV.	USR
242	B	KINNAURI LOCAL	IND
275	B	P.SATIVUM-CRETE	CRE
235	B	P.SATIVUM-ETHIOPIA	ETH
297	B	THOMAS LAXTON	EU
1102	B	KEERAU PEA	NEP
1090	B	P.SATIVUM SSP.SYRIACUM	TUK
1111	B	KEERAU PEA	NEP
1188	B	PETROLINE	Brasil
1113	B	KEERAU PEA	NEP
1117	B	KEERAU PEA	NEP
1372	B	MUMMY PEA	SUD
1124	B	KEERAU PEA	NEP
1999	B	P.SATIVUM-ETHIOPIA	ETH
1789	B	P.SATIVUM-NEPAL	NEP
2018	B	P.SATIVUM-LADAKH	IND
2344	B	YOU YAN BAI	CHN
2355	B	P.SATIVUM-NEPAL	NEP
2348	B	BAI WAN DOU	CHN
2356	B	P.SATIVUM-NEPAL	NEP
2349	B	DA BAI WAN DOU 159	CHN
2357	B	P.SATIVUM-ETHIOPIA	ETH
2350	B	DA WAN DOU	CHN
2358	B	P.SATIVUM-ETHIOPIA	ETH
2351	B	BAI WAN DOU 229	CHN
2352	B	HUN WAN DOU	CHN
2360	B	P.SATIVUM-ETHIOPIA	ETH
2361	B	P.SATIVUM-ETHIOPIA	ETH
2479	B	KNIGHTS DWARF WHITE	EU
2362	B	P.SATIVUM-ETHIOPIA	ETH
2679	B	MUMMY PEA-Td	SUD
2363	B	P.SATIVUM-ETHIOPIA	ETH
3017	B	P. SATIVUM- NEPAL	NEP
2364	B	P.SATIVUM-ETHIOPIA	ETH
3018	B	P. SATIVUM- NEPAL	NEP
2365	B	P.SATIVUM-ETHIOPIA	ETH
3019	B	KEERAU	NEP
2370	B	LUD	NEP
3111	B	Katmandu Green	NEP
2371	B	LUD ROGUE	EU
3112	B	Katmandu Black	NEP
84	B	P.SATIVUM-AFGHANISTAN	AFG
82	B	P.SATIVUM-AFGHANISTAN	AFG
94	B	P.SATIVUM-AFGHANISTAN	AFG
149	B	PELLEWS MERTON-1	EU
109	B	P.SATIVUM-AFGHANISTAN	AFG
218	B	FIELD PEA-INDIA	IND
217	B	FIELD PEA	IND
276	B	P.SATIVUM-ETHIOPIA	ETH
278	B	P.SATIVUM-AFGHANISTAN	AFG
285	B	P.SATIVUM-AFGHANISTAN	AFG
299	B	PEERLESS	EU
290	B	P.SATIVUM-ETHIOPIA	USR
699	B	KARMAZINOVYJ	USR
975	B	P.SATIVUM-COSTA RICA	CRI
700	B	IVORA	USR
1055	B	ICA BOJACA	CLB
702	B	DOLFIJN	USR
1057	B	ANTIOQUIA I CHILENA	CLB
1348	B	P.SATIVUM-RUSSIA	USR
1366	B	P.SATIVUM-INDIA	IND
1266	B	P.SATIVUM-INDIA	IND
1369	B	P.SATIVUM-INDIA	IND
1491	B	P.SATIVUM-CHINA	CHN
1496	B	P.SATIVUM-CHINA	CHN
1519	B	P.SATIVUM-ETHIOPIA	ETH
1528	B	P.SATIVUM-HINDUKUSCH	AFG
1520	B	P.SATIVUM-ETHIOPIA	ETH
1529	B	P.SATIVUM-ETHIOPIA	ETH
1530	B	P.SATIVUM-ETHIOPIA	ETH
1523	B	P.SATIVUM-ETHIOPIA	ETH
1531	B	P.SATIVUM-ETHIOPIA	ETH
1533	B	P.SATIVUM-HINDUKUSCH	AFG
1526	B	P.SATIVUM-ETHIOPIA	ETH
1535	B	P.SATIVUM-CHINA	CHN
1527	B	P.SATIVUM-ETHIOPIA	ETH
1539	B	P.SATIVUM-CHINA	CHN
1551	B	P.SATIVUM-ETHIOPIA	ETH
1552	B	P.SATIVUM-ETHIOPIA	ETH
1545	B	P.SATIVUM-CHINA	CHN
1553	B	P.SATIVUM-WBH 1957	ETH
1554	B	P.SATIVUM-CHINA	CHN
1547	B	P.SATIVUM-HINDUKUSCH	AFG
1548	B	P.SATIVUM-HINDUKUSCH	AFG
1575	B	P.SATIVUM-CHINA	CHN
1549	B	P.SATIVUM-ETHIOPIA	ETH
1577	B	SHANG TSAI	CHN
1550	B	P.SATIVUM-HINDUKUSCH	AFG
1635	B	P.SATIVUM-ETHIOPIA	ETH
1706	B	CLAMART x P.ELATIUS	EU
1636	B	P.SATIVUM-ETHIOPIA	ETH
1707	B	P.ELATIUS x 1/3870	EU
1637	B	P.SATIVUM-ETHIOPIA	ETH
1724	B	NEAPOLITAN	EU
1638	B	P.SATIVUM-ETHIOPIA	ETH
1725	B	NATIVE CHINESE	CHN
1639	B	P.SATIVUM-ETHIOPIA	ETH
1726	B	GRIS DE PRINTEMPS	EU
1657	B	P.SATIVUM-CHINA	CHN
1727	B	GRIS D'HIVER	EU
1658	B	P.SATIVUM-AFGHANISTAN	AFG
1756	B	INDIAN PEAS	NEP
1922	B	P.SATIVUM-CHINA	CHN
1777	B	ST.NICOLAS	ESP
1923	B	P.SATIVUM-ETHIOPIA	ETH
2065	B	P.SATIVUM-TANZANIA	TAZ
1844	B	P.SATIVUM-MEXICO	MEX
2066	B	P.SATIVUM-TANZANIA	TAZ
2068	B	NEPAL 1 AND 2	NEP
1852	B	P.SATIVUM-ETHIOPIA	ETH
2071	B	TIMO	EU
2377	B	P.SATIVUM-ZAIRE	Africa
2107	B	CENNIA	EU
2378	B	P.SATIVUM-RWANDA	Africa
2199	B	P.SATIVUM-USSR	USR
2200	B	P.SATIVUM-USSR	USR
2380	B	P.SATIVUM-BURUNDI	Africa
2263	B	WILD TUNESIAN	Africa
2381	B	P.SATIVUM-BURUNDI	Africa
2382	B	P.SATIVUM-ETHIOPIA	ETH
2265	B	PRIMITIVE ALBANIAN	Balkan
2383	B	P.SATIVUM-ZAMBIA	Africa
2376	B	P.SATIVUM-ZAIRE	Africa
2384	B	P.SATIVUM-ZAMBIA	Africa
2421	B	P.SATIVUM-LATVIA	USR
2423	B	P.SATIVUM ARVENSE	USR
2636	B	P.SATIVUM-MALAWI	Africa
2558	B	P. ASIATICUM	USR
2637	B	P.SATIVUM-MALAWI	Africa
2640	B	P.SATIVUM-MALAWI	Africa
3002	B	P.SATIVUM-INDIA	IND
3003	B	P.SATIVUM-INDIA	IND
3020	B	NORD	USR
3095	B	LINE A	USR
3023	B	SGE	USR
3096	B	LINE B	USR
3049	B	Fix-/1	USR
3097	B	LINE E	USR
3072	B	OK4	USR
3114	B	Grave Digger	EU
3083	B	OK27	USR
3116	B	Prew's Special	EU
1432	B	P.SATIVUM-ETHIOPIA	ETH
1449	B	P.SATIVUM-ETHIOPIA	ETH
1450	B	P.SATIVUM-ETHIOPIA	ETH
1460	B	P.SATIVUM-ETHIOPIA	ETH
1451	B	P.SATIVUM-ETHIOPIA	ETH
1461	B	P.SATIVUM-ETHIOPIA	ETH
1452	B	P.SATIVUM-ETHIOPIA	ETH
1462	B	P.SATIVUM-ETHIOPIA	ETH
1453	B	P.SATIVUM-ETHIOPIA	ETH
1463	B	P.SATIVUM-ETHIOPIA	ETH
1454	B	P.SATIVUM-ETHIOPIA	ETH
1478	B	P.SATIVUM-AFGHANISTAN	AFG
1470	B	P.SATIVUM-ETHIOPIA	ETH
1480	B	P.SATIVUM-AFGHANISTAN	AFG
1473	B	P.SATIVUM-AFGHANISTAN	AFG
1483	B	P.SATIVUM-AFGHANISTAN	AFG
1476	B	P.SATIVUM-AFGHANISTAN	AFG
1493	B	P.SATIVUM-HINDUKUSCH	AFG
1505	B	P.SATIVUM-HINDUKUSCH	AFG
1494	B	P.SATIVUM-HINDUKUSCH	AFG
1506	B	P.SATIVUM-HINDUKUSCH	AFG
1495	B	P.SATIVUM-HINDUKUSCH	AFG
1507	B	P.SATIVUM-HINDUKUSCH	AFG
1498	B	P.SATIVUM-ETHIOPIA	ETH
1508	B	P.SATIVUM-HINDUKUSCH	AFG
1499	B	P.SATIVUM-ETHIOPIA	ETH
1509	B	P.SATIVUM-HINDUKUSCH	AFG
1500	B	P.SATIVUM-ETHIOPIA	ETH
1510	B	P.SATIVUM-HINDUKUSCH	AFG
1501	B	P.SATIVUM-ETHIOPIA	ETH
1511	B	P.SATIVUM-HINDUKUSCH	AFG
1502	B	P.SATIVUM-ETHIOPIA	ETH
1512	B	P.SATIVUM-HINDUKUSCH	AFG
1513	B	P.SATIVUM-HINDUKUSCH	AFG
1581	B	P.SATIVUM-ETHIOPIA	ETH
1590	B	P.SATIVUM-ETHIOPIA	ETH
1582	B	P.SATIVUM-ETHIOPIA	ETH
1591	B	P.SATIVUM-ETHIOPIA	ETH
1583	B	P.SATIVUM-ETHIOPIA	ETH
1584	B	P.SATIVUM-ETHIOPIA	ETH
1593	B	P.SATIVUM-ETHIOPIA	ETH
287	B	P.SATIVUM-ETHIOPIA	ETH
1606	B	P.SATIVUM-ETHIOPIA	ETH
2642	B	P.SATIVUM-MALAWI	Africa
2644	B	P.SATIVUM-MALAWI	Africa
2645	B	P.SATIVUM-MALAWI	Africa
2989	B	P.SATIVUM-INDIA	IND
2646	B	P.SATIVUM-MALAWI	Africa
2647	B	P.SATIVUM-MALAWI	Africa
2648	B	P.SATIVUM-MALAWI	Africa
212	C	P.SATIVUM ARVENSE	ETH
267	C	P.SATIVUM-GREECE	CRE
268	C	P.SATIVUM-CRETE	GRC
1010	C	P.FULVUM	IRN
1103	C	KEERAU PEA	NEP
928	C	KELVEDON TRIUMPH ROGUE	EU
1104	C	KEERAU PEA	NEP
931	C	TELEGRAPH ROGUE	EU
1014	C	MARO ROGUE	EU
1042	C	KING TUT	USA
1108	C	KEERAU PEA	NEP
1087	C	P.SATIVUM SSP.SYRIACUM	TUK
1109	C	KEERAU PEA	NEP
1110	C	KEERAU PEA	NEP
1338	C	P.SATIVUM-KASHMIR	IND
1116	C	KEERAU PEA	NEP
1358	C	MUMMY PEA	SUD
1122	C	KEERAU PEA	NEP
1705	C	P.JOMARDII	SUD
1708	C	MUMMY WHITE	SUD
1141	C	LANCASHIRE LAD	CAN
1187	C	ELEGANTE	Brasil
1710	C	MUMMY BICOLOUR	SUD
1711	C	FRENCH SUGARxMUMMY BICOL.	EU
1755	C	P.SATIVUM-NEPAL	NEP
1842	C	CNPH 16-81 CV	Brasil
1786	C	P.SATIVUM-NEPAL	NEP
2014	C	LATAH	NEP
2359	C	P.SATIVUM-ETHIOPIA	ETH
91	C	P.SATIVUM-AFGHANISTAN	AFG
158	C	P.SATIVUM-ETHIOPIA	ETH
157	C	P.SATIVUM-SUDAN	SUD
172	C	P.SATIVUM-ETHIOPIA	ETH
1837	C	P.SATIVUM-SPAIN	ESP
209	C	P.SATIVUM ARVENSE	IND
208	C	STAMBORYJ-71	USR
222	C	FIELD PEA-INDIA	IND
221	C	FIELD PEA-INDIA	IND
99	C	P.SATIVUM-AFGHANISTAN	AFG
251	C	P.SATIVUM-ETHIOPIA	ETH
253	C	P.SATIVUM-ETHIOPIA	ETH
154	C	CONTROL DUN PEA AUREOOL	EU
256	C	MATRI	IND
229	C	P.SATIVUM-MALAYA	IND
257	C	H 57	IND
231	C	EMITAKE	UGD
258	C	LOCAL NO 44	PAK
273	C	P.SATIVUM-ETHIOPIA	ETH
269	C	P.SATIVUM-GREECE	GRC
293	C	VWB 051	EU
286	C	P.SATIVUM-GREECE	GRC
294	C	VWB 068	EU
295	C	P.SATIVUM-GREECE	GRC
289	C	P.SATIVUM-GREECE	GRC
364	C	DE OBIDOS	PRT
373	C	CASUSA	PRT
365	C	CLAMART A TROIS GOUSSES	PRT
374	C	DA BEIRA	PRT
366	C	MARVILLA DA AMERICA	PRT
375	C	MEIA PALHA NACIONAL	PRT
368	C	SABEL	PRT
1258	C	P.SATIVUM-INDIA	IND
1261	C	P.SATIVUM-INDIA	IND
1262	C	P.SATIVUM-INDIA	IND
1263	C	P.SATIVUM-INDIA	IND
1264	C	P.SATIVUM-INDIA	IND
1540	C	P.SATIVUM-GREECE	GRC
1541	C	P.SATIVUM-HINDUKUSCH	AFG
1555	C	P.SATIVUM-CHINA	CHN
1542	C	P.SATIVUM-HINDUKUSCH	AFG
1567	C	EDISON	USA
1568	C	CM-014F	USA
1585	C	P.SATIVUM-ETHIOPIA	ETH
1570	C	SPIRIT	USA
1586	C	P.SATIVUM-ETHIOPIA	ETH
1579	C	P.SATIVUM-ETHIOPIA	ETH
1588	C	P.SATIVUM-ETHIOPIA	ETH
1580	C	P.SATIVUM-ETHIOPIA	ETH
1592	C	P.SATIVUM-ETHIOPIA	ETH
1594	C	P.SATIVUM-ETHIOPIA	ETH
1602	C	P.SATIVUM-ETHIOPIA	ETH
45	S	P.TRANSCAUCASICUM	ISR
64	S	P.ELATIUS	AFG
190	S	WIRAIG	ETH
2724	S	P.ELATIUS (MAYBE empty)	USR
198	S	P.ELATIUS	ISR
199	S	P.ELATIUS	ISR
243	S	TWS-7/1	IND
200	S	P.THEBAICUM	IND
245	S	P.SATIVUM-RUSSIA	ISR
249	S	P.ELATIUS	ETH
224	S	P.FULVUM	ETH
254	S	P.ELATIUS	USR
263	S	P.SATIVUM-BALKANS	BALK
264	S	P.SATIVUM-GREECE	GRC
280	S	P.SATIVUM-ALBANIA	AFG
1007	S	P.FULVUM	ISR
1084	S	P.SATIVUM-TURKEY	ISR
1009	S	P.FULVUM	ISR
1088	S	P.SATIVUM SSP.SYRIACUM	ISR
1091	S	P.ELATIUS	TUK
1011	S	P.FULVUM	TUK
1093	S	P.ELATIUS	TUK
1030	S	P.SATIVUM-IRAN	GRC
1095	S	P.ELATIUS	GRC
3001	S	IRAN Pr1 - (MAYBE empty)	IRAN
1100	S	P.SATIVUM-TURKEY	NEP
1121	S	KEERAU PEA	IND
1398	S	P.ELATIUS	MON
1259	S	P.SATIVUM-INDIA	AFG
1457	S	P.ABYSSINICUM	TUK
1267	S	P.SATIVUM-INDIA	IND
1632	S	P.ABYSSINICUM	ETH
1758	S	P.SATIVUM-NEPAL	NEP
1633	S	P.ABYSSINICUM	NEP
1640	S	P.ABYSSINICUM	NEP
1795	S	P.ELATIUS	ISR
2544	S	P.FULVUM	ISR
2603	S	P. SPECIOSUM-LIBYA	LIBYA
2546	S	P. TRANSCAUCASICUM	USR
2608	S	P. SPECIOSUM-LIBYA	LIBYA
2547	S	P. TRANSCAUCASICUM	USR
2624	S	1999-06-13	EU
2548	S	P. TRANSCAUCASICUM	USR
2629	S	P.ELATIUS-SIMEIZ	ISR
2549	S	P. TRANSCAUCASICUM	USR
2630	S	P.ELATIUS-KARA-DAG	USR
2551	S	P. SATIVUM SIBERIACUM	LBY
2674	S	P.ABYSSINICUM	ETH
2553	S	P. ARVENSE-GEORGIA	USR
2675	S	P.ABYSSINICUM	ETH
2602	S	P. SPECIOSUM-LIBYA	LIBYA
2698	S	P.HUMILE	ISR
5	S	MUMMY PEA	SUD
184	S	KHADRAA	SUD
27	S	FIELD PEA-SUDAN	SUD
185	S	WIRAIG	SUD
41	S	DW.JOHNSONS EMPIRE	EU
187	S	WIRAIG	SUD
42	S	MUMMY PEA	SUD
188	S	WIRAIG	SUD
70	S	INFECUNDA	EU
189	S	WIRAIG	SUD
181	S	KEERAU PEA	NEP
192	S	WIRAIG	SUD
182	S	P.SATIVUM-KHATMANDU	NEP
183	S	KHADRAA	SUD
194	S	AROUS EL SHOAG	SUD
204	S	P.SATIVUM CINEREUM GOV.	USR
205	S	P.SATIVUM IRCUTIANUM GOV.	USR
228	S	P.SATIVUM-BOLIVIA	BOL
926	S	MARKET GEM ROGUE	EU
927	S	PILOT ROGUE	EU
1105	S	KEERAU PEA	NEP
1107	S	KEERAU PEA	NEP
2353	S	DA BAI WAN DOU 122	CHN
2345	S	BAI WAN DOU 034	CHN
2354	S	P.SATIVUM-NEPAL	NEP
2347	S	BAI WAN DOU 049	CHN
2407	S	IZUMRUNDYJ	USR
75	S	WBH 1470	EU
76	S	WBH 1471	EU
1832	S	P.SATIVUM-SPAIN	ESP
77	S	WBH 1472	EU
87	S	P.SATIVUM-AFGHANISTAN	AFG
78	S	WBH 1473	EU
88	S	P.SATIVUM-AFGHANISTAN	AFG
80	S	P.SATIVUM-AFGHANISTAN	AFG
89	S	P.SATIVUM-AFGHANISTAN	AFG
81	S	P.SATIVUM-AFGHANISTAN	AFG
90	S	P.SATIVUM-AFGHANISTAN	AFG
83	S	P.SATIVUM-AFGHANISTAN	AFG
92	S	P.SATIVUM-AFGHANISTAN	AFG
113	S	USATYJ	USR
95	S	P.SATIVUM-AFGHANISTAN	AFG
125	S	GRISEOSTRIATA-gri	EU
96	S	P.SATIVUM-AFGHANISTAN	AFG
138	S	CHLOROTICA-chi	EU
97	S	P.SATIVUM-AFGHANISTAN	AFG
150	S	WINGES	EU
98	S	P.SATIVUM-AFGHANISTAN	AFG
163	S	P.SATIVUM-ETHIOPIA	ETH
246	S	P.SATIVUM-RUSSIA	USR
176	S	P.SATIVUM-ETHIOPIA	ETH
100	S	P.SATIVUM-AFGHANISTAN	AFG
214	S	P.SATIVUM ARVENSE	IND
101	S	P.SATIVUM-AFGHANISTAN	AFG
1792	S	P.SATIVUM-NEPAL	NEP
115	S	L 180/60	USR
114	S	L 5618-af,tl	USR
127	S	WBH 592	EU
126	S	WBH 450	EU
140	S	B668-1057	EU
139	S	CHLOROTICA-chi	EU
152	S	NILSSONS-N3	EU
151	S	NILSSONS-N1	EU
165	S	P.SATIVUM-ETHIOPIA	ETH
164	S	SUGGY	EU
178	S	P.SATIVUM-ETHIOPIA	ETH
177	S	P.SATIVUM-ETHIOPIA	ETH
216	S	KANAWARI	IND
215	S	ASAUJI	IND
1826	S	P.SATIVUM-SPAIN	ESP
1825	S	P.SATIVUM-SPAIN	ESP
102	S	P.SATIVUM-AFGHANISTAN	AFG
111	S	P.SATIVUM-AFGHANISTAN	AFG
117	S	GLANO 0632	EU
124	S	PINKISH WHITE	EU
230	S	EMISERESERE	UGD
137	S	CHLOROTICA-chi-3	EU
233	S	MUKYIRA	UGD
1827	S	P.SATIVUM-SPAIN	ESP
162	S	P.SATIVUM-ETHIOPIA	ETH
1828	S	P.SATIVUM-SPAIN	ESP
175	S	P.SATIVUM-ETHIOPIA	ETH
1829	S	P.SATIVUM-SPAIN	ESP
1836	S	P.SATIVUM-SPAIN	ESP
223	S	FIELD PEA-INDIA	IND
1791	S	P.SATIVUM-NEPAL	NEP
110	S	P.SATIVUM-AFGHANISTAN	AFG
1834	S	P.SATIVUM-SPAIN	ESP
122	S	OLYMPIA 1	EU
136	S	WBH 1385	EU
135	S	WBH 1352	EU
148	S	NILSSONS N-2	EU
1835	S	P.SATIVUM-SPAIN	ESP
160	S	P.SATIVUM-ETHIOPIA	ETH
159	S	P.SATIVUM-ETHIOPIA	ETH
174	S	P.SATIVUM-ETHIOPIA	ETH
173	S	P.SATIVUM-ETHIOPIA	ETH
211	S	LUCKNOW BONIYA	IND
210	S	LUCKNOW BONIYA	IND
250	S	P.JOMARDII	SUD
248	S	MUSNNA	AFG
108	S	P.SATIVUM-AFGHANISTAN	AFG
107	S	P.SATIVUM-AFGHANISTAN	AFG
121	S	PURPURVIOLETTSCHOTIGE	EU
120	S	SABEL	EU
134	S	NAVICULA APERTUS-nap	EU
133	S	GRAY RADICULA	EU
146	S	HAMMARLUNDS K LINE	EU
145	S	EXTRA RAPID NILSSON	EU
106	S	P.SATIVUM-AFGHANISTAN	AFG
105	S	P.SATIVUM-AFGHANISTAN	AFG
119	S	GRAUE POSTHORNCHEN	EU
118	S	WBH 22	EU
132	S	WBH 1072	EU
131	S	PROCUMBENS-pro	EU
144	S	B768-50-2	ETH
143	S	B268-394-3	USA
156	S	P.SATIVUM-SUDAN	SUD
155	S	MUTANT-6-5	EU
170	S	P.SATIVUM-ETHIOPIA	ETH
169	S	P.SATIVUM-ETHIOPIA	ETH
207	S	P.SATIVUM CHORESMICUM	USR
201	S	P.THEBAICUM	EU
220	S	FIELD PEA	IND
219	S	FIELD PEA	IND
104	S	P.SATIVUM-AFGHANISTAN	AFG
103	S	P.SATIVUM-AFGHANISTAN	AFG
1838	S	P.SATIVUM-SPAIN	ESP
116	S	PARVUS	USR
129	S	LACINIATA-lac	EU
128	S	WBH 741	EU
142	S	B768-369-20	USA
141	S	B768-50-1	USA
241	S	P.HUMILE	ISR
153	S	TEDINS 29/31	EU
168	S	P.SATIVUM-ETHIOPIA	ETH
167	S	P.SATIVUM-ETHIOPIA	ETH
197	S	P.SATIVUM-GEORGIA	USR
180	S	P.SATIVUM-ETHIOPIA	ETH
12	S	LAMM 31	EU
232	S	MAISHO	UGD
66	S	ENGLISH SABEL	EU
244	S	P.SATIVUM-RUSSIA	USR
85	S	P.SATIVUM-AFGHANISTAN	AFG
247	S	PYARA MATAR	IND
123	S	P.STRIATA	ETH
259	S	LOCAL NO 44/2A	PAK
260	S	LOCAL NO 44/2B	PAK
274	S	P.SATIVUM-ETHIOIA	ETH
265	S	P.SATIVUM-GREECE	GRC
266	S	P.SATIVUM-GREECE	GRC
277	S	P.SATIVUM-ETHIOPIA	ETH
270	S	P.SATIVUM-AFGHANISTAN	AFG
279	S	P.SATIVUM-ETHIOPIA	ETH
271	S	P.SATIVUM-ETHIOPIA	ETH
281	S	P.SATIVUM-ETHIOPIA	ETH
272	S	P.SATIVUM-ETHIOPIA	ETH
282	S	P.SATIVUM-ETHIOPIA	ETH
283	S	P.SATIVUM-ETHIOPIA	ETH
291	S	P.SATIVUM-ETHIOPIA	ETH
284	S	P.SATIVUM-AFGHANISTAN	AFG
292	S	P.SATIVUM-GREECE	GRC
288	S	P.SATIVUM-GREECE	GRC
296	S	CHEMIN LONG	EU
302	S	HUNDREDFOLD	EU
363	S	LINCOLN	PRT
367	S	TELEFONE ANA	PRT
376	S	LINCOLN	EU
377	S	MARMA	EU
369	S	CHICHARA	PRT
378	S	HERO	EU
371	S	POIS GRIS DE PRINTEMPS	PRT
379	S	WEITOR	EU
372	S	POIS GRIS D'HIVER	PRT
380	S	VALOR	EU
381	S	DA 265	EU
659	S	MANGETOUT DE 40-JOURS	EU
752	S	P.SATIVUM-INDIA	IND
704	S	P.SATIVUM-AFGHANISTAN	AFG
1058	S	ICA GUATECANA	CLB
708	S	P.SATIVUM-AFGHANISTAN	AFG
1073	S	P.SATIVUM-TURKEY	TUK
710	S	P.SATIVUM-GREECE	GRC
1080	S	P.SATIVUM-TURKEY	TUK
715	S	P.SATIVUM	USR
1081	S	P.SATIVUM-TURKEY	TUK
1082	S	P.SATIVUM-TURKEY	TUK
1135	S	P.SATIVUM-ETHIOPIA	ETH
1083	S	P.SATIVUM-TURKEY	TUK
1085	S	P.SATIVUM-TURKEY	TUK
1173	S	ERVILHE CASUSA	POR
1086	S	P.SATIVUM-TURKEY	TUK
1174	S	ERVILHE COLOSSAL DELICIE	POR
1125	S	P.SATIVUM-INDIA	IND
1183	S	MUTANT M3-STIFF STRAW	USR
1126	S	P.SATIVUM-INDIA	IND
1249	S	P.SATIVUM-INDIA	IND
1128	S	P.SATIVUM-INDIA	IND
1250	S	P.SATIVUM-TURKEY	TUK
1132	S	P.SATIVUM-TURKEY	TUK
1253	S	P.SATIVUM-COSTA RICA	CRI
1268	S	P.SATIVUM-INDIA	IND
1269	S	P.SATIVUM-INDIA	IND
1344	S	P.SATIVUM-HINDUKUSCH	IND
1345	S	P.SATIVUM-MONGOLIA	MON
1367	S	P.SATIVUM-INDIA	IND
1368	S	P.SATIVUM-TURKEY	TUK
1371	S	P.SATIVUM-TURKEY	TUK
1492	S	P.SATIVUM-HINDUKUSCH	AFG
1399	S	HAITIAN CV	HAT
1401	S	MANOA SUGAR	USA
1497	S	P.SATIVUM-MONGOLIA	MON
1439	S	ETHIOPIAN PEA	ETH
1503	S	P.SATIVUM-CHINA	CHN
1486	S	P.SATIVUM-AFGHANISTAN	AFG
1504	S	P.SATIVUM-CHINA	CHN
1487	S	P.SATIVUM-AFGHANISTAN	AFG
1517	S	P.SATIVUM-RUSSIA	USR
1488	S	P.SATIVUM-ETHIOPIA	ETH
1518	S	P.SATIVUM-CHINA	CHN
1524	S	P.SATIVUM-HINDUKUSCH	AFG
1525	S	P.SATIVUM-GREECE	GRC
1634	S	P.SATIVUM-ETHIOPIA	ETH
1698	S	ABYSSINIAN	ETH
1775	S	P.SATIVUM-CHILE	CHL
1776	S	ST.MAURIN	FRA
1778	S	CULDRIS	FRA
1924	S	P.SATIVUM-ETHIOPIA	ETH
1843	S	P.SATIVUM-ISRAEL	GBR
1845	S	P.HIEMALE-PERU	GER
2069	S	NEPAL 3	NEP
1871	S	P.SATIVUM-ALBANIA	ALB
2070	S	NEPAL 4	NEP
2379	S	P.SATIVUM-RWANDA	Africa
2264	S	TERRAS HADA	Africa
2607	S	P. SPECIOSUM-LIBYA	Africa
2571	S	P. SATIVUM-GEORGIA	USR
2604	S	P. SPECIOSUM-LIBYA	Africa
2649	S	P.SATIVUM-MALAWI	Africa
2641	S	P.SATIVUM-MALAWI	Africa
2650	S	P.SATIVUM-MALAWI	Africa
2605	S	P. SPECIOSUM-LIBYA	Africa
2688	S	RUSSIAN COOKING PEA	USR
2606	S	P. SPECIOSUM-LIBYA	Africa
3092	S	OK26	USR
3098	S	LINE F	USR
3077	S	OK12	USR
3113	S	Jeyes	USR
3080	S	OK21	USR
3117	S	Weavers Glory	EU
3150	S	P. ELATIUS	EU
3118	S	Bean Pea	EU
3151	S	P. ELATIUS	EU
3131	S	IREGI-5	EU
3153	S	P. ELATIUS	EU
3132	S	AURALIA	EU
3155	S	P. ELATIUS	EU
3133	S	RAMAN	EU
3156	S	P. ELATIUS	wild
3147	S	P. ELATIUS	wild
3157	S	P. ELATIUS	wild
3148	S	P. ELATIUS	wild
3158	S	P. ELATIUS	wild
3149	S	P. ELATIUS	wild
3159	S	P. ELATIUS	wild
459	S	KESTREL	EU
469	S	TLETA	EU
460	S	TARGET	EU
470	S	ZEM	EU
462	S	HYOGO SUGAR	JPN
471	S	TARGET	EU
464	S	BLACK EYE	JPN
472	S	CORONA IMPERIALE	EU
465	S	FRENCH SUGAR	JPN
474	S	NEPTUNE	USA
466	S	EARLY THIRTY DAYS	JPN
475	S	H 302-2	USA
476	S	H 311-2-1	USA
468	S	HOJU SUGAR	JPN
477	S	H 163-3	USA
961	S	P.SATIVUM-TURKEY	TUK
969	S	P.SATIVUM-GERMANY	GEM
962	S	P.SATIVUM-TURKEY	TUK
970	S	P.SATIVUM-HOLLAND	NDL
963	S	P.SATIVUM-TURKEY	TUK
971	S	REVA	TUK
964	S	P.SATIVUM-TURKEY	TUK
972	S	UMBELLATA PURP.FLD.ACACIA	TUK
965	S	P.SATIVUM-TURKEY	TUK
973	S	P.SATIVUM-USA	USA
966	S	PROCO	EU
974	S	PURPLE PODS	USA
976	S	P.SATIVUM-HOLLAND	NDL
968	S	P.SATIVUM-ETHIOPIA	ETH
977	S	EROICA	NDL
978	S	TKOROSPELYJ-16	USR
987	S	JUBILEJNYJ-62	USR
980	S	CISMINSKIJ-210	USR
989	S	ULADOVSKIJ JUB	USR
981	S	UL'JANOVSKIJ-68	USR
990	S	MIRAQUEEN	EU
982	S	ULADOVSKIJ 8	USR
991	S	TRUMPET	EU
983	S	CELIABINSKIJ-71	USR
992	S	TORSDAG	USR
984	S	SATILOV ZERNOZ	USR
993	S	TORSDAG-K6	USR
985	S	PELUSKA	USR
994	S	TORSDAG-K10	USR
986	S	OMSKIJ	USR
995	S	TORSDAG-K58	USR
1021	S	SLEAFORD ORBITER	EU
1029	S	P.SATIVUM-INDIA	IND
1022	S	PARTRIDGE	NZL
1032	S	P.SATIVUM-INDIA	IND
1023	S	PIRI	NZL
1033	S	P.SATIVUM-INDIA	IND
1024	S	PATEA	NZL
1025	S	PUKE	NZL
1035	S	P.SATIVUM-TURKEY	TUK
1026	S	PANIA	NZL
1036	S	P.SATIVUM-GERMANY	EU
1027	S	RAMTO	EU
1037	S	P.SATIVUM-TURKEY	TUK
1028	S	P.SATIVUM-INDIA	IND
1038	S	P.SATIVUM-TURKEY	TUK
1062	S	CUNDINAMARCA-6	CLB
1071	S	BESELIYA	TUK
1063	S	CUNDINAMARCA-9	CLB
1072	S	AKARA	TUK
1065	S	WSU-7	USA
1076	S	P.SATIVUM-TURKEY	TUK
1066	S	WSU-12	USA
1077	S	P.SATIVUM-TURKEY	TUK
1067	S	WSU-23	USA
1079	S	P.SATIVUM-TURKEY	TUK
1068	S	BIRTE	EU
1097	S	P.SATIVUM-TURKEY	TUK
1069	S	WILTY-wil	USA
1098	S	P.SATIVUM-TURKEY	TUK
1070	S	AKARA	TUK
1099	S	P.SATIVUM-TURKEY	TUK
1256	S	NIGRO-UMBILICATUM	GER
1426	S	79-2022-af	USA
957	S	TRIUMPH	USA
1427	S	79-2024-af	USA
959	S	P.SATIVUM-TURKEY	TUK
1428	S	P.TIBETANICUM	TIB
979	S	JUZNYJ	USR
1429	S	AFGHANISTAN PEA	AFG
1015	S	FROGEL	EU
1430	S	P.SATIVUM-ETHIOPIA	ETH
1045	S	74-SN4	USA
1431	S	P.SATIVUM-ETHIOPIA	ETH
1089	S	P.SATIVUM SSP.SYRIACUM	TUK
954	S	731497-731499	EU
1196	S	MISOG-1:st	USA
1433	S	P.SATIVUM-ETHIOPIA	ETH
1442	S	P.SATIVUM-ETHIOPIA	ETH
1434	S	P.SATIVUM-ETHIOPIA	ETH
1443	S	P.SATIVUM-ETHIOPIA	ETH
1435	S	P.SATIVUM-ETHIOPIA	ETH
1444	S	P.SATIVUM-ETHIOPIA	ETH
1436	S	P.SATIVUM-ETHIOPIA	ETH
1445	S	P.SATIVUM-ETHIOPIA	ETH
1437	S	P.SATIVUM-ETHIOPIA	ETH
1446	S	P.SATIVUM-ETHIOPIA	ETH
1438	S	P.SATIVUM-ETHIOPIA	ETH
1447	S	P.SATIVUM-ETHIOPIA	ETH
1440	S	P.SATIVUM-ETHIOPIA	ETH
1448	S	P.SATIVUM-ETHIOPIA	ETH
1441	S	P.SATIVUM-ETHIOPIA	ETH
1464	S	P.SATIVUM-ETHIOPIA	ETH
1455	S	P.SATIVUM-ETHIOPIA	ETH
1465	S	P.SATIVUM-ETHIOPIA	ETH
1456	S	P.SATIVUM-ETHIOPIA	ETH
1466	S	P.SATIVUM-ETHIOPIA	ETH
1459	S	P.SATIVUM-ETHIOPIA	ETH
1467	S	P.SATIVUM-ETHIOPIA	ETH
1468	S	P.SATIVUM-ETHIOPIA	ETH
1479	S	P.SATIVUM-AFGHANISTAN	AFG
1471	S	P.SATIVUM-AFGHANISTAN	AFG
1481	S	P.SATIVUM-AFGHANISTAN	AFG
1474	S	P.SATIVUM-AFGHANISTAN	AFG
1482	S	P.SATIVUM-AFGHANISTAN	AFG
1475	S	P.SATIVUM-AFGHANISTAN	AFG
1484	S	P.SATIVUM-AFGHANISTAN	AFG
1477	S	P.SATIVUM-AFGHANISTAN	AFG
1490	S	P.SATIVUM-ETHIOPIA	ETH
1559	S	MEXIQUE 4	MEX
1514	S	P.SATIVUM-HINDUKUSCH	AFG
1560	S	COBRI	EU
1515	S	P.SATIVUM-HINDUKUSCH	AFG
1561	S	CEROSA-wex	EU
1516	S	P.SATIVUM-HINDUKUSCH	AFG
1563	S	CENTUARY-af	EU
1534	S	P.SATIVUM-ETHIOPIA	ETH
1564	S	TRAPPER-af	EU
1536	S	P.SATIVUM-ETHIOPIA	ETH
1565	S	MID FREEZER	EU
1537	S	P.SATIVUM-ETHIOPIA	ETH
1566	S	ALMOTA	EU
1589	S	P.SATIVUM-ETHIOPIA	ETH
1595	S	P.SATIVUM-ETHIOPIA	ETH
1603	S	P.SATIVUM-ETHIOPIA	ETH
1596	S	P.SATIVUM-ETHIOPIA	ETH
1604	S	P.SATIVUM-ETHIOPIA	ETH
1597	S	P.SATIVUM-ETHIOPIA	ETH
3175	S	P.SATIVUM-CANARIES	EU
3167	S	Torsdag	EU
3176	S	P.SATIVUM-CANARIES	EU
3168	S	phyA-1	EU
3177	S	P.SATIVUM-CANARIES	EU
3169	S	pcd2-1	EU
3179	S	P.SATIVUM-CANARIES	EU
3170	S	phyB-5	EU
3180	S	P.SATIVUM-CANARIES	EU
3171	S	phyA-1, phyB-5	EU
3181	S	P.SATIVUM-CANARIES	EU
3183	S	P.SATIVUM-CANARIES	EU
3085	S	SPARKLE dgl	EU
3184	S	P.SATIVUM-CANARIES	EU
3178	S	P.SATIVUM-CANARIES	EU
3185	S	P.SATIVUM-CANARIES	EU
2686	S	EMERALD GEM	EU
2701	S	K.577	EU
2986	S	NARROW LEAF BASE-nlb	EU
3004	S	ALMA	EU
3006	S	PIG 16	EU
255	S	P.ELATIUS	ISR
227	X	P.ABYSSINICUM	ETH
1006	X	P.FULVUM	ISR
1008	X	P.FULVUM	ISR
1012	X	P.FULVUM	TUK
1094	X	P.ELATIUS	GRC
1096	X	P.ELATIUS	GRC
1392	X	P.FULVUM	IND
1458	X	P.ABYSSINICUM	CHN
800	X	P.ELATIUS	ALB
1703	X	P.ELATIUS	ETH
130	X	P.ABYSSINICUM	SUD
2	X	P.ABYSSINICUM	ETH
225	X	P.ABYSSINICUM	IND
226	X	P.ABYSSINICUM	ETH
		Remarks: x is extra size band

## Sheet: USDA
PI number	eIF4E variant	Name	Origin
116056	A	Matar	India, Matar
193584	A	No. 8696	Ethiopia
249645	A	B.R. 178	India
269818	A	Aa134	UK, England
272194	A	CONCOLON	Germany
314795	A	CPI 12561	Australia
347457	A	PLP 264	India, Uttar Pradesh
347477	A	PLP 503	India, Uttar Pradesh
356984	A	PLP 70	India, Uttar Pradesh
356986	A	PLP 174	India, Punjab
356991	A	PLP 196	India, Haryana
356992	A	PLP 197A	India, Haryana
39722	A	ARAGORN	USA, Washington
39729	A	LIFTER	USA, Washington
39730	A	PRO-081-6118	USA, Washington
39732	A	PRO-PRL-415	USA, Washington
39734	A	PS03101445	USA, Washington
39747	A	PS06100542	USA, Washington
125839	B	MIZHIK	Afghanistan
272171	B	ZEYLANICUM, SELECTAS PELUSCHKE	Germany
274307	B	809	Pakistan
274308	B	815	Pakistan
319374	B	Col. No. 22074	Mexico
433560	B		Israel
17293	B	PAK10198	Pakistan
184130	C	No. 309	Serbia
263027	C	MANGETOUT CORNE DE BELEIR	France
324700	C	MUNCHENER WEISSBLUHENDE WINTERERBSE	Hungary
324702	C	UNRRA/972/	Hungary
343824	C	Col. 6946	Uganda
343958	C	BISELIA	Turkey
343977	C		Turkey
505122	C	ILCA 5089	Albania
639969	C	VIR K-5322	Nepal
639981	C	W6 12733, Pleven 10	Bulgaria
357292	S	KIFLICA	Former Serbia and Montenegro
181799	S	No. 9901	Lebanon
263032	S	POIS MANGETOUT FONDANT DE SAINT DISERAT	France
344009	S		Greece
357290	S	BRZAK	Macedonia
103058	S	PAI WAN TOU	China Beijing
109866	S	ARVEJAS VERDES	Venezuela
102888	S	No. 8	China Beijing
116844	S	MATTAR	Pakistan
116944	S	Moshong	Afghanistan
117264	S	No. 215	Turkey
117998	S	ERVILHA TORTA FLOR ROXA	Brazil
118501	S	ERVILHA BRANCA	Brazil
121352	S	No. 1891	India
124478	S	Matar	pakistan
125840	S	Moshong	Afghanistan
134271	S	No. 10	Afghanistan
137118	S	CHINESE PURPLE	Canada, Manitoba
137119	S	GRAY'S	USA
140298	S	No. 6618	Iran
142775	S	ALBERGA	USA, Alberga
143485	S		Azerbaijan
155109	S		USA, Rhode Island
156647	S		Ethiopia
156720	S	THIRTY-DAYS	Japan
162909	S	L.P. NO. 4	Paraguay
163126	S	Matar	India, Matar
164548	S	Matar	India, Madya Pradesh
164612	S	Patani	India
164779	S	Matar	India
164971	S	No. 17	Turkey
164972	S	No. 48	Turkey
165949	S	Matar	India
166159	S	No. 9705	Nepal
166084	S	Matar	India
169608	S	BEZELYA YESIL	Turkey
172339	S	MANSHOLT PLUK	Netherland
173840	S		India
174921	S	KALAON	Nepal
175231	S	KOLUNG	Nepal
179450	S	No. 9747	Syria
179451	S	No. 9749	Syria
179459	S	No. 10072	Turkey
179722	S	No. 10898	India
179970	S	Matar	India
180329	S	Watana	India
180693	S	HOHENHEIMER PINK-FLOWERED	Germany
180696	S	MAHNDORFER VIKTORIA	Germany
180699	S	RIMPAUS GREEN VIKTORIA	Germany
180702	S	STRENGS WEIHENSTEPHANER FELDERBSE	Germany
181801	S	No. 9922	Syria
181958	S	Homs No. 334	syria
183467	S	Matar	India
184784	S		Guinea
193578	S	No. 8508	Ethiopia
193590	S	No. 8736	Ethiopia
195020	S	No. 9292	Ethiopia
195404	S	QUEZALTENANGO	Guatemala
195631	S	No. 9886	Ethiopia
197044	S	No. 3005	Honduras
197990	S	VINCO	Netherland
198072	S	BRIOART	Sweden
198074	S	GORSDAGSART III	Sweden
198735	S		Afghanistan
201390	S	No. 3153	mexico
203066	S		Finland
203067	S		Finland
203068	S		Finland
203069	S		Finland
206006	S	DEBUT 149	Sweden
206838	S	EVERBEARING	USA, Wisconsin
206861	S	CARTERS MARKET GARDENER	USA, Wisconsin
207508	S	No. 12616	Afghanistan
209507	S	No. 3843	Costa Rica
210558	S	No. S-653	China
210561	S	No. S-688	Former Soviet Union
210568	S	KELINA	Finland
210569	S	SIVIKKA	Finland
210571	S	FLO	Finland
210583	S	ROGERS ACE	USA, Iowa
212031	S	No. 4	Iran, Tehran
212917	S	VATANA MATAR	India
220174	S	No. 13	Afghanistan
220189	S	Moshong	Afghanistan
221697	S	No. 12	Indonesia
222071	S	Moshong	Afghanistan
222117	S	Moshong	Afghanistan
227258	S	No. 14918	Iran
236492	S	LAMPRECHT #368	USA, Iowa
273605	S		Ecuador
241593	S		Taiwan
242027	S		Denmark
242028	S		Denmark
244093	S	APOLLO	Netherland
244150	S	GOLDKONIGIN	Netherland
244175	S	LAGE SMELTPEUL	Netherland
244191	S	MORGENSTER	Netherland
248181	S	Col. No. 23171	Rwanda
250438	S	LIBOCHOVICKY RANY	Czech Republic
250439	S	KONSERVOVA KRALOVNA (CSR)	Czech Republic
250440	S	KARLOVNA KONSERVY	Czech Republic
250441	S	PREBOHATY	Czech Republic
250444	S	ZAZRAK Z KELVEDONU	Czech Republic
250446	S	LIBOCHOVICKY URODNY	Czech Republic
250447	S	LINCOLN	Czech Republic
250448	S	LIBOCHOVICKY RANY	Czech Republic
253968	S	Col. No. K1722	Afghanistan
257244	S	TUNG HAUN	China
257592	S		Ethiopia
261622	S	Col. No. D-43	Spain
261623	S	GUISANTE PIRABESQUE	Spain
261624	S	Col. No. D-45	Spain
261636	S	No. D-88	Spain
261671	S	DEGRACE	Netherland
261677	S	Col. No. D-236	Netherland
263014	S	SLIER OF KROMBEK	Netherland
263030	S	POIS DU CHEMEN LONG	France
263871	S		Greece
266070	S	LINE NO. 930	Sweden
269761	S	Aa135	Czech Republic
269762	S	Aa38	UK, England
269777	S	Aa87	UK, England
269778	S	Aa88	UK, England
269782	S	Aa92	UK, England
269791	S	BROCHETTE	UK, England
269798	S		UK, England
269802	S	Aa112	UK, England
269804	S	Aa117	UK, England
269812	S	Aa128	UK, England
269822	S	PERFECTION	UK, England
269825	S	Aa175	UK, England
270536	S		Denmark
271033	S	ABYSSINICUM	Sweden
271035	S	HINDUKUSCH	Sweden
271038	S	GRANART	nepal
271116	S	GRANERBSE	China
271511	S	1295	India
272148	S	NAVALE ARTTURI	Finland
272175	S	ZEYLANICUM	Germany
272184	S	ARVENSE	Greece
272218	S		Poland
272215	S	POPULATION LUCIENHOFER WINTERERBSE	Germany
272216	S	WINTER-FUTTERERBSE	Bulgaria
163129	S		India
273209	S	9009/60	Russia
273605	S		UK, England
274584	S		Norway
275821	S	Line 3	Sweden
275822	S	WITHAM WONDER	Sweden
275825	S	Line 8	Sweden
277852	S	No. 8090	Ethiopia
279823	S	EDELPERLE	Germany
279825	S	FOLI NO. 2	Germany
280252	S	No. 8120	Ethiopia
280603	S	PALESTINICUM	Israel
280609	S	AMPLISSIMO LOCAL	Former Soviet Union
280611	S	AMPLISSIMO VIKTORIA UKRAINSKAYA	Ukraine
280613	S	AMPLISSIMO BOREC	Former Soviet Union
280614	S	AMPLISSIMO NEISTOSCIMYJ	Former Soviet Union
280616	S	AMPLISSIMO ZAZERSKIJ	Former Soviet Union
280617	S	AMPLISSIMO HAMISEPP	Estonia
280619	S	AMPLISSIMO TYGEVSKIJ KIRJU	Former Soviet Union
280626	S	AMPLISSIMO YJULSKIJ	Former Soviet Union
285710	S	KUJAWSKI POZNY	Poland
285715	S	ZOLTY OLBRAZYMI	Poland
285717	S	NIEZNANICKA CIEMNA	Poland
285718	S	POMORSKA	Poland
285722	S	KONSERWOWY I HAR	Poland
285724	S	LINCOLN-FREEGE	Poland
285727	S	MAJOWY	Poland
285730	S	CUD AMERYKI	Poland
285740	S	JUVEL	Poland
285747	S	KONSERVENKONIGIN	Poland
286430	S		nepal
286431	S	Matar	Nepal
286607	S		Thailand
288025	S	QUIKI	France
293426	S	No. 30	Bulgaria
306591	S	PJELJUSKA PASSZKAJA	Hungary
307666	S	VERJA	Costa Rica
308796	S	SYLVIA	India
314794	S	CPI 12559	Australia
320972	S		Hungary
324695	S	ARAKASS	Hungary
324697	S	GRIS D'HIVER	Hungary
324703	S	WUNTERBERGISCHE-WINTERERBSE POPULATION	Hungary
324706	S	No. 833	Romania
331413	S	Col. R-44	Ethiopia
331414	S	Col. 795-B	Ethiopia
340128	S	1-301	Turkey
340130	S	1-305	Turkey
343292	S		USA, Idaho
343321	S		USA, Idaho
343331	S		USA, Idaho
343338	S		USA, Idaho
343972	S	22630	Turkey
343979	S	22725	Turkey
343987	S	22718	Turkey
344003	S	22703	Turkey
344007	S	22621	Greece
344010	S	22732	Greece
344011	S	22733	Greece
344012	S	22734	Greece
344013	S	22735	Greece
344538	S	2	Sicily, Italy
347281	S	PLP 10	India, Uttar Pradesh
347295	S	PLP 26	India, Uttar Pradesh
347490	S	PLP 82	India, Uttar Pradesh
347496	S	PLP 105A	India, Uttar Pradesh
355906	S	KOMIDORI	Japan
356974	S	PLP 120	India, Punjab
356980	S	PLP 16A	India, Uttar Pradesh
358300	S	27b	Ethiopia
358613	S	22867	Ethiopia
358620	S	22758	Ethiopia
358633	S	22778	Ethiopia
358640	S	22791	Ethiopia
365419	S	BR 1-49-9	Canada, Manitoba
371796	S		New Zealand
378157	S	RED FLOWER NO. 1	Malaysia
381334	S	IMPOSANT BROWN	Netherland
393488	S	KLATOVSKA OZIMA	Czech Republic
393489	S	MUNCHEN WEISBLUHENDE	Czech Republic
393490	S		Czech Republic
404225	S	PINSKIJ MESTNYJ	Former Soviet Union
409031	S	HOHENHEIMER ROSABLUEHENDE	Germany
411141	S	PANIA	New Zealand
411142	S	PATEA	New Zealand
413678	S	ZLOTY OLBRZYMI	Hungary
413683	S	LANCET	Hungary
413685	S	NZ 51	Hungary
413688	S	UJMAJORI KORAI VIKTORIA	Hungary
413698	S	GRUNE PERLE	Hungary
413703	S	I.P. 2	Hungary
429839	S	MUSUS	Afghanistan
429843	S	TORSDAG	Former Soviet Union
429845	S	KOMBAJNOVYJ 5	Former Soviet Union
429849	S	UZBEKSKIJ	Former Soviet Union
430702	S	BARDI	Hungary
476409	S	ROTA	Latvia
476410	S	MIRONOVSKIJ 186	Ukraine
476413	S	UL'IANOVSKIJ-72	Russia
477371	S	ROSAKRONE	Denmark
486131	S	E8454-A-F	Ecuador
494077	S		Chile
499982	S		China
505059	S	ILCA 5076	Sudan
505062	S	ILCA 5005	Greece
505080	S	ILCA 5039	Cyprus
505108	S	ILCA 5072	Greece
505127	S	ILCA 5094	Albania
505144	S	ILCA 5115	Spain
560055	S	L. 89	Russia
560056	S	L. 90	Russia
560058	S	L. 104	Israel
560069	S	L. 100	Israel
204306	S	Dunn	Australia
601516	S	Solara	Netherland
619079	S	Shawnee (single plant selection)	USA, Washington
639964	S		Bulgaria
639962	S	TKM37-327	Turkmenistan
639967	S	VIR K-7290	India
639968	S	VIR K-7036	Nepal
639974	S	VIR 2743	Georgia
639976	S	W6 12738, P-77	Bulgaria
639977	S	W6 12737. P-226	Bulgaria
639980	S	W6 12734, Mir	Bulgaria
10925	S	B92-47	Bulgaria
12723	S	PLEVEN 2	Bulgaria
12738	S	P-77	USA, Washington
12739	S	MARKOVO 1	Bulgaria
15008	S	VIR 2524	Israel
15009	S	VIR 2743	USA, Washington
15010	S	VIR 2998	Latvia
15019	S	VIR 7328	Turkey
15028	S	VIR K-2381	USA, New York
15041	S	54-757	USA, New York
15043	S	54-759	unknown
15044	S	54-760	unknown
15046	S	54-761	USA, New York
15047	S	54-763	USA, New York
15048	S	54-764	USA, New York
20025	S	B97-43	Bulgaria
20026	S	B97-44	Bulgaria
24570	S	TMK37-327	USA, Washington
26109	S	G0801	Georgia
26127	S	G1501	Georgia
26154	S	G2501	Georgia
26157	S	Ontofo	Georgia
26160	S	Levakhane	Georgia
26161	S	Nokalskesni	Georgia
26370	S	Pe9	USA, Washington
26373	S	Pe13	USA, Washington
31707	S	VIR K-1193	Russia
39723	S	ARIEL	USA, Washington
39724	S	BANNER	USA, Washington
39725	S	CAROUSEL	USA, Washington
39726	S	COLUMBIAN L1	USA, Washington
39727	S	DELTA	USA, Washington
39728	S	DS ADMIRAL	USA, Washington
39731	S	PRO-5187	USA, Washington
39735	S	PS03101822
39736	S	PS04100462
39737	S	PS04100710
39738	S	PS05100120
39739	S	PS05100522
39740	S	PS05100632
39741	S	PS05100735
39742	S	PS05100736
39743	S	PS05100840
39745	S	PS05101240
39746	S	PS06100490
39748	S	PS06100617
39749	S	PS06100760
39750	S	PS06101004
39751	S	PS06101043
39753	S	PS06101338
39754	S	PS07100170
39755	S	PS07100396
39756	S	PS07100470
39757	S	PS07100471
39758	S	PS07100474
39759	S	PS07100480
39760	S	PS07100914
39761	S	STIRLING	USA, Washington
39762	S	UNIVERSAL	USA, Washington
39733	S	PS02101137
39744	S	PS05101142
39752	S	PS06101119

## Sheet: CGN
CGN number	eIF4E variant	Origin
CGN 03275	B	Pakistan
CGN 03277	B	Pakistan
CGN 03280	B	Pakistan
CGN 03285	B	Pakistan
CGN 03287	B	Pakistan
CGN 03290	B	Pakistan
CGN 03295	B	Pakistan
CGN 03299	B	Pakistan
CGN 03302	B	Pakistan
CGN 03307	B	Pakistan
CGN 03311	B	Pakistan
CGN 03319	B	Pakistan
CGN 3323	B	Pakistan
CGN 03100	S	Pakistan

## Sheet: IPK
IPK number	eIF4E variant	Origin
467	A	Afghanistan
468	A	Afghanistan
479	A	Afghanistan
477	B	Afghanistan
446	S	Afghanistan
447	S	Afghanistan
448	S	Afghanistan
449	S	Afghanistan
450	S	Afghanistan
451	S	Afghanistan
452	S	Afghanistan
453	S	Afghanistan
454	S	Afghanistan
455	S	Afghanistan
456	S	Afghanistan
457	S	Afghanistan
458	S	Afghanistan
459	S	Afghanistan
460	S	Afghanistan
461	S	Afghanistan
462	S	Afghanistan
463	S	Afghanistan
464	S	Afghanistan
465	S	Afghanistan
466	S	Afghanistan
469	S	Afghanistan
470	S	Afghanistan
471	S	Afghanistan
472	S	Afghanistan
473	S	Afghanistan
474	S	Afghanistan
475	S	Afghanistan
476	S	Afghanistan
478	S	Afghanistan
499	S	Afghanistan

## Sheet: ATFC
ATC number	eIF4E variant	status	Origin	Province	Name
1044	A		India
6926	B		China	Henan	BAI WAN DOU
6927	B	heterogenous	China	Henan	WAN DOU
6928	B		China	Henan	DU SHU WAN DOU
6930	B		China	Henan	WAN DOU
6931	B		China	Henan	YING KE DOU
6960	B	heterogenous	China	Xinjiang	YI LI DA LI
6962	B		China	Qinghai	BAI WAN DOU
6973	B		China	Qinghai	DANG DI XIAO WAN DOU
6975	B		China	Qinghai	QING WAN DOU
6992	B		China	Xizang	ZHOU PI WAN DOU
7008	B		China	Xizang	HE LAN DOU
7021	B		China	Sichuan	BAI WAN
7025	B		China	Sichuan	HONG HUA CAI
7028	B	heterogenous	China	Sichuan	CAI WAN
7034	B		China	Yunnan	BAI WAN DOU
7041	B		China	Shanxi	BAI KE WAN DOU
7045	B		China	Shanxi	MA CAI WAN DOU
7058	B		China	Shanxi	BEN DI WAN DOU
7068	B		China	Shanxi	MA WAN DOU
7072	B	heterogenous	China	Shanxi	WAN DOU
7081	B	heterogenous	China	Nei Mongol	LU WAN DOU
7082	B	heterogenous	China	Henan	LI WAN DOU
7083	B	heterogenous	China	Henan	WAN DOU
7086	B		China	Henan	BO GE HUI
7102	B	heterogenous	China	Nei Mongol	WAN DOU
7103	B	heterogenous	China	Nei Mongol	WAN DOU
7115	B	heterogenous	China	Jiangsu	AI ZI WAN DOU
7121	B		China	Guizhou	WAN DOU
7130	B		China	Anhui	WAN DOU
7134	B		China	Anhui	BAI WAN DOU
7137	B	heterogenous	China	Anhui	MA WAN DOU
7140	B		China	Anhui	WAN DOU
7143	B	heterogenous	China	Hubei	MA WAN DOU
7146	B		China	Guizhou	MA ZHAI DA BAI WAN
7157	B	heterogenous	China	Guizhou	ROU WAN
7162	B		China	Nei Mongol	BAI WAN DOU
7173	B		China	Guangxi	HUANG WAN DOU
7187	B	heterogenous	China	Guangxi	BAI WAN DOU
7190	B		China	Guangxi	WAN DOU
7197	B	heterogenous	China	Guangxi	CAI WAN
7201	B		China	Guangxi	WAN DOU
7203	B	heterogenous	China	Guangxi	MA WAN
7212	B		China	Hubei	BAI CAI WAN DOU
7215	B	heterogenous	China	Hubei	YING GUO WAN
7218	B		China	Hubei	MA WAN DOU
6924	S		China	Henan	WAN DOU
6932	S		China	Yunnan	WAN DOU
6936	S		China	Nei Mongol	HUI WAN DOU
6937	S		China	Nei Mongol	LI MI WAN DOU
6943	S		China	Shaanxi	YANG WAN DOU
6944	S		China	Shaanxi	DA BAI WAN DOU
6949	S		China	Shaanxi	WAN DOU
6951	S		China	Shaanxi	MA WAN DOU
6952	S		China	Shaanxi	HONG HUA CAI WAN DOU
6953	S		China	Shaanxi	YANG WAN DOU
6954	S		China	Beijing	BEI JING YI HAO
6956	S		China	Beijing	ZAO SHU YI HAO
6958	S		China	Guangdong	HONG HUA WAN DOU
6959	S		China	Guangdong	CHAO SHAN DA JIA
6969	S		China	Qinghai	BAI WAN DOU
6972	S		China	Qinghai	LIU SHI DOU
6985	S		China	Qinghai	DA QING DOU
6994	S		China	Shanxi	WAN DOU
6995	S		China	Gansu	BAI YANG DOU
6996	S		China	Gansu	WAN DOU
6997	S		China	Ningxia	WAN DOU
7000	S		China	Shanghai	WAN DOU
7004	S		China	Shanghai	WAN DOU
7006	S		China	Yunnan	XIAO CAI WAN DOU
7012	S		China	Xizang	WAN DOU
7013	S		China	Qinghai	CAI WAN DOU
7022	S		China	Sichuan	ZHU SHA HONG WAN
7037	S		China	Shanxi	AI WAN DOU
7038	S		China	Shanxi	DA BAI WAN DOU
7044	S		China	Shanxi	MA CAI WAN DOU
7050	S		China	Shanxi	CAI WAN DOU
7052	S		China	Shanxi	JIN WAN DOU
7055	S		China	Shanxi	HONG WAN DOU
7061	S		China	Shanxi	DONG WAN DOU
7062	S		China	Shanxi	MA WAN DOU
7071	S		China	Shanxi	MA WAN DOU
7076	S		China	Gansu	WAN DOU
7077	S		China	Ningxia	WAN DOU
7078	S		China	Guangxi	WAN DOU
7080	S		China	Gansu	CAI WAN DOU
7089	S		China	Nei Mongol	XIAO LI WAN DOU
7092	S		China	Xizang	WAN DOU
7095	S		China	Xinjiang	WAN DOU
7096	S		China	Xinjiang	TIAN WAN DOU
7097	S		China	Xinjiang	LU WAN DOU
7098	S		China	Nei Mongol	CHUN GUA PI WAN DOU
7100	S		China	Nei Mongol	GUA PI WAN DOU
7106	S		China	Nei Mongol	LI MI WAN DOU
7113	S		China	Nei Mongol	HUI PI WAN DOU
7119	S		China	Sichuan	KE WAN
7120	S		China	Guizhou	ROU WAN
7125	S		China	Shaanxi	XIAO HU LU WAN DOU
7128	S		China	Nei Mongol	MA WEN WAN DOU
7149	S		China	Guizhou	YU SHAN DA BAI WAN
7152	S		China	Guizhou	BAI ROU WAN
7154	S		China	Guizhou	XIAO ROU WAN
7155	S		China	Guizhou	MA ROU WAN
7158	S		China	Guizhou	BAI NI MA WAN
7161	S		China	Nei Mongol	BAI WAN DOU
7165	S		China	Nei Mongol	LU WAN DOU
7168	S		China	Nei Mongol	YUN ER WAN
7171	S		China	Nei Mongol	DA KE WAN DOU
7175	S		China	Guangxi	XIAO DONG WAN
7178	S		China	Guangxi	ZAI MIAO DONG DOU
7181	S		China	Guangxi	BAI WAN
7184	S		China	Guangxi	BAI WAN
7192	S		China	Guangxi	ZHU SHA HONG
7194	S		China	Guangxi	YANG MAO WAN
7198	S		China	Guangxi	WAN DOU
7205	S		China	Guangxi	MA WAN DOU
7206	S		China	Guangxi	MA WAN DOU
7209	S		China	Guangxi	WAN DOU

## Sheet: VIR
VIR number	eIF4E variant	Name	Origin
999	S		Mongolia
1001	S		Mongolia
1009	S		Mongolia
1010	S		Mongolia
1015	S		Mongolia
1246	S	Mielkak	Tadjikistan
1250	S	Mielkak	Tadjikistan
1541	S	Zelyenyj	Prymorskyj kraj
1548	S		Prymorskyj kraj
1553	S	Myelkyj	Amurskaya obl.
1566	S	Myestnyj	Tyummenskaya obl.
1569	S	Myestnyj	Tyummenskaya obl.
1578	S	Sacharnyj	Tomskaya oblasť
1584	S	Kamyshlovskyj mramornyj myelkyj	Sverdlovskaya obl.
1587	C	Myestnyj	Sverdlovskaya obl.
1589	S	Myestnyj	Sverdlovskaya obl.
1590	S	Myestnyj	Sverdlovskaya obl.
1592	S	Gybrydnyj 3213	Kirovskaya obl.
1593	S	Gybrydnyj 3419	Kirovskaya obl.
2098	S	Myestnyj	Armenie
2101	S	Myestnyj	Armenie
2302	S	K 88	Georgia
2305	S	K 64	Georgia
2306	S	K 41	Georgia
2307	S	K 2	Georgia
2311	S	K 14	Georgia
2313	S	K 29	Georgia
2314	S	K 38	Georgia
2315	S	K 50	Georgia
2318	S	K 36	Georgia
2319	S	K 31	Georgia
2320	S	K24	Georgia
2420	S	Myestnyj	Morocco
2421	S	Myestnyj	Morocco
2425	S	P. arvense. cultivee	Algeria
2426	S	Myestnaya populyacya	Algeria
4587	S	Zelyenaya Valdoria	GER
4618	S	537-12	Lotvenia
4751	S	Tchyshmynskyj 39	RUS
4759	S	K 207	RUS
4760	S	K 209	RUS
4832	S	Pionier	Latvia
4889	S	Izumrudnyj Puschkynskyj gybrid	RUS
4924	S	Viktoria Kesoi	HUN
4934	S	Primaverile	ITA
5026	S	Sinikka /Jokionen/	FIN
5299	S	Shtambovyj 56-15	UKR
5313	S	NT 7c	BUL
5470	S	Spitfire	GBR
5683	S	Jade	USA
5689	S	Gome	Sweden
5705	S	Kazanskyj 38	RUS
5727	S	Desarales	CSK
5981	S	Creamette	CAN
6364	S	Laga	NLD
6416	S	Guliver	HUN
6434	S	Alaska 47	USA
6625	S	Basuto Gellora	Uganda
6668	S	Anik	FRA
6918	S	Ulyanovskyj 72	RUS
6931	S	Primavil	FRA
6986	S	Tharkovkyj 74	UKR
7408	S	Nike	POL
7816	S	Raport	UKR
7824	S	Safir	DNK
7971	S	Agidel	RUS
7974	S	5T B80	RUS
9033	S	L-26120	RUS
9098	S	Gubernator	RUS

## Sheet: CzNPC
	ECN	Pozn.	Pozn.	eIF4E variant	Accession Name	Origin
L01	0955			A	B 99/98	RUS
L01	0956			A	B 99/100	RUS
L01	0957			A	B 99/103	RUS
L01	0958			A	B 99/104	RUS
L01	0959			A	B 99/106	RUS
L01	0960			A	B 99/108	RUS
L01	0961			A	B 99/112	RUS
L01	0962			A	B 99/116	RUS
L01	0963			A	B 99/118	RUS
L01	00991	CAN	Franklin	A	Franklin	CAN
L01	00994	CAN	Lifter	A	Lifter	CAN
L02	0382			A	Etiopie	ETH
L01	0137			B	Hindukusch I.	IND
L01	0138			B	Hindukusch II.	IND
L01	0198			B	Peas Hoshiar puri	IND
L01	0308			B	Uladovskij 6	SUN
L02	0334			B	Hindukusch
L02	0385			B	Hindukusch 326	SUN
L01	0001			S	Dětenický žlutý velkozrnný	CSK
L01	0002			S	Klatovsky zeleny	CSK
L01	0003			S	Liblicky Bastard	CSK
L01	0004			S	Milion zeleny	CSK
L01	0005			S	Milion zluty	CSK
L01	0006			S	Slovensky Expres	CSK
L01	0007			S	Slovensky konservovy	CSK
L01	0008			S	Viktoria 75	CSK
L01	0009			S	Viktoria 800	CSK
L01	0010			S	Stupicky zeleny	CSK
L01	0011			S	Zidlochovicky Viktoria rany	CSK
L01	0012			S	Jupiter	CSK
L01	0013			S	CL 16.4	CSK
L01	0014			S	Viktoria CL 16.6	CSK
L01	0015			S	CL 18.5	CSK
L01	0016			S	CL 18.7	CSK
L01	0017			S	Hrach ze Samikovic CL 19.1	CSK
L01	0018			S	CL 19.6	CSK
L01	0019			S	N.sl.Detenicky Milion	CSK
L01	0020			S	Diosecky Kentisch	CSK
L01	0021			S	Kanadsky zeleny	CAN
L01	0022			S	Kanadsky zluty	CAN
L01	0023			S	Konservova kralovna	CSK
L01	0024			S	KR 1946	CSK
L01	0025			S	Milevsky krajovy	CSK
L01	0026			S	Prebohaty	CSK
L01	0027			S	Saxa	CSK
L01	0028			S	Moravsky Hrotovicky krajovy	CSK
L01	0029			S	Stupicky velkozrnny zluty	CSK
L01	0030			S	Terrasol zluty	CSK
L01	0031			S	Zborovicky Viktoria	CSK
L01	0032			S	Zborovicky zluty	CSK
L01	0033			S	Zidlochovicky Folger	CSK
L01	0034			S	Majskij 13	SUN
L01	0035			S	Ramonskij 77	SUN
L01	0036			S	Rannij Zelenyj 033	SUN
L01	0037			S	Rostovskij	SUN
L01	0038			S	Rusky bily drobnozrnny	SUN
L01	0039			S	Rusky bily velkozrnny	SUN
L01	0040			S	Rusky zeleny	SUN
L01	0041			S	Stepnoja	SUN
L01	0042			S	Uladovskij 208	SUN
L01	0043			S	N.sl.Kralice I	CSK
L01	0044			S	Sielecki C.Z.	POL
L01	0045			S	Zebaci	BGR
L01	0046			S	Frauenlob Strengs grune	GER
L01	0047			S	Friedburger gelbe Viktoria	GER
L01	0048			S	Hohenheimer grune Viktoria	GER
L01	0049			S	Jenaer gelbe Viktoria	GER
L01	0050			S	Leigensteiner	GER
L01	0051			S	Lohmans Weender Grunbleib.Folg	GER
L01	0052			S	Mansdorfer gelbe Viktoria	GER
L01	0053			S	Mansholt's extra Kort groene	NLD
L01	0054			S	Nordost fruhe grune	GER
L01	0055			S	Nordost kleine weise	GER
L01	0056			S	Peragis Felderbse	GER
L01	0057			S	Rimpaus grune Viktoria	GER
L01	0058			S	Ruhmers gelbe Viktoria	GER
L01	0059			S	Salzmunder gelbe Viktoria	GER
L01	0060			S	Salzmunder kleine Grune	GER
L01	0061			S	Schors Rappoldshofer gelbe Vik	GER
L01	0062			S	Weissbluhende Niedrige	GER
L01	0063			S	Walwitzer gelbe Viktoria	GER
L01	0064			S	Waldmanns Waldoria	GER
L01	0065			S	Zeiners kurz und gut	GER
L01	0066			S	Murilo	NLD
L01	0067			S	Weibulls Kloster Erbse	SWE
L01	0068			S	Svalofs Buttererbse	SWE
L01	0069			S	Svalofs Torsdagsart	SWE
L01	0070			S	Kalle Pea	FIN
L01	0071			S	Paula Pea	FIN
L01	0072			S	Sinikka Pea	FIN
L01	0073			S	Americky	USA
L01	0074			S	Dickson	USA
L01	0075			S	Kanadsky Arthur	CAN
L01	0076			S	Kanadsky Mackay	CAN
L01	0077			S	Michauxii	FRA
L01	0078			S	Jihoafricky krmny	JAR
L01	0079			S	Jihoafricky zeleny	JAR
L01	0080			S	Pisum sativum KM 12	IND
L01	0081			S	Mala Porynanka	CSK
L01	0082			S	Nejranejsi BXB	CSK
L01	0083			S	Nejranejsi majovy	CSK
L01	0084			S	Liliput	CSK
L01	0085			S	Rekord	CSK
L01	0086			S	Unica	CSK
L01	0087			S	VM 10,polni zluty kulaty	CSK
L01	0088			S	Zeleny nizky	CSK
L01	0089			S	Rannij Majskij	SUN
L01	0090			S	Stambovij 2	SUN
L01	0091			S	Aler Fijuerskij	BGR
L01	0092			S	Saxa	HUN
L01	0093			S	Plovdivskiij	BGR
L01	0094			S	Aviator	FRA
L01	0095			S	Terras Brunswige	GER
L01	0096			S	Caractacus	GBR
L01	0097			S	Early Bird	GBR
L01	0098			S	ICA 5354	HUN
L01	0099			S	Express	GBR
L01	0100			S	Plowdiwski Furajen	BGR
L01	0100			S	Plowdivski Furajen	BGR
L01	0101			S	Borek	CSK
L01	0102			S	Konserven Konigin	HUN
L01	0103			S	Konservgyongye	HUN
L01	0104			S	Laxton Superb	GBR
L01	0105			S	Dalibor	CSK
L01	0106			S	Proteus	CSK
L01	0107			S	Inter	CSK
L01	0108			S	Uberreich	GBR
L01	0109			S	Kleine Rheinlanderin	GBR
L01	0110			S	Brunsviga	GER
L01	0111			S	Buchsbaum fruhe	GER
L01	0112			S	Echo	GER
L01	0113			S	Exalda	GER
L01	0114			S	Heralda	GER
L01	0115			S	Kleine Weissenfelserin	GER
L01	0116			S	Krineruv zeleny velkozrnny	GER
L01	0117			S	Maibote	GER
L01	0118			S	Maiperle	GER
L01	0119			S	Mansholt's Pluk	NLD
L01	0120			S	Onsa	GER
L01	0121			S	Orlik	CSK
L01	0122			S	Satilovskij zelenozernyj	SUN
L01	0123			S	Caractacus	GBR
L01	0124			S	Bountiful	GBR
L01	0125			S	Pencil Pod	GBR
L01	0126			S	Princ Albert	GBR
L01	0127			S	Alasca	USA
L01	0128			S	Hijlkema Unica	NLD
L01	0129			S	Konserva	NLD
L01	0130			S	Parel C.B.	NLD
L01	0131			S	Rondo C.B.	NLD
L01	0132			S	Saxa	GER
L01	0133			S	Stijfstro C.B.	NLD
L01	0134			S	Unica	NLD
L01	0135			S	Zelka	NLD
L01	0136			S	Unica	NLD
L01	0139			S	Pisum sativum var.Coronatum
L01	0140			S	P.sat.var. melanocarppum
L01	0141			S	Pisum sempervirens
L01	0142			S	Alerfruheste Mai	GER
L01	0143			S	British Lion	GBR
L01	0144			S	Americky 184	USA
L01	0145			S	Belgicky zeleny	BEL
L01	0146			S	Jihoafricky I	JAR
L01	0147			S	Jihoafricky II	JAR
L01	0148			S	Holandsky	NLD
L01	0149			S	Kaleva	FIN
L01	0150			S	Koivisto	FIN
L01	0151			S	Novozelandsky	NZL
L01	0152			S	Skory Express	CSK
L01	0153			S	Expres	POL
L01	0154			S	Szecsiotygodniowy	POL
L01	0155			S	Tabu	GER
L01	0156			S	Fruhe niedrige Volltragende	DNK
L01	0157			S	Kronenerbse	GER
L01	0158			S	P.sat.var.chloromelan.KOERN.	GER
L01	0159			S	Early Blue	GBR
L01	0160			S	Cristal	USA
L01	0161			S	Juran	CSK
L01	0162			S	Svalofs Concordiaart	SWE
L01	0163			S	Zeiners Frankonia	GER
L01	0164			S	Zeiners Tiefgrune	GER
L01	0165			S	Buchbom White	GBR
L01	0166			S	Tulunskij zelenyj	SUN
L01	0167			S	Rapid Weibull's extra	SWE
L01	0168			S	Hustler	USA
L01	0169			S	Burpess Best, Extra early	USA
L01	0170			S	Chancellor	USA
L01	0171			S	Chatenay	FRA
L01	0172			S	Ilo	FIN
L01	0173			S	Neuer Riesen Schnabel	GER
L01	0174			S	Ruhm von Wietz	GER
L01	0175			S	Sangster No I.
L01	0176			S	Svalofs Gyllenart	SWE
L01	0177			S	Giant Stride	USA
L01	0178			S	Zeiners Gold	GER
L01	0179			S	Allerfruheste Mai	AUT
L01	0180			S	Czwartkowy	POL
L01	0181			S	Wiktoria PZHR	POL
L01	0182			S	Cernigovskij 190	SUN
L01	0183			S	Szn-Jan-Cz-Jao-Szn	CHN
L01	0184			S	Cin-Si-Da-Li	CHN
L01	0185			S	Nan-Czin-Tjan-Van-Dor	CHN
L01	0186			S	Wiktoria Lagiewnicki	POL
L01	0187			S	Belocerkovskij 1	SUN
L01	0188			S	Superba
L01	0189			S	Early Spring	GBR
L01	0190			S	Welcome	GBR
L01	0191			S	Favorit	GER
L01	0192			S	Zeiners Grune Bastard	GER
L01	0193			S	Kujawski Wczesny	POL
L01	0194			S	Wiktoria Pozny	POL
L01	0195			S	Qurante Deux
L01	0196			S	Serpette Guilloteaux	FRA
L01	0197			S	Serpette Vert	FRA
L01	0199			S	Servo	NLD
L01	0200			S	Kleinwanzlebener	GER
L01	0202			S	Hadmerslebener Grune	GER
L01	0203			S	Hallorengold	GER
L01	0204			S	Mansfelder Grune	GER
L01	0205			S	Nordsaat	GER
L01	0206			S	Waldmanns Goldkugel	GER
L01	0207			S	Waldmanns Grune Waldoria	GER
L01	0208			S	Grad Amurskij	SUN
L01	0209			S	Snezinka	SUN
L01	0210			S	Uladovskij 5	SUN
L01	0211			S	Urozajnyj P-1	SUN
L01	0212			S	Monopol	CHE
L01	0213			S	Principe	ITA
L01	0214			S	Serpette	ITA
L01	0215			S	Tiny Tin	USA
L01	0216			S	Iregszemcsei P.I.	HUN
L01	0217			S	Ujmajori Kesei Viktoria	HUN
L01	0218			S	Sofia Nr.5	BGR
L01	0219			S	Ural 1	SUN
L01	0220			S	Tolbuchin	BGR
L01	0221			S	English Early Bird Improved	GBR
L01	0222			S	Extra Early Market	USA
L01	0223			S	Extra Early Eight Weeks	USA
L01	0224			S	Radio	USA
L01	0225			S	Genri	SUN
L01	0226			S	Dukat	CSK
L01	0227			S	Zwaan's Aurora	NLD
L01	0228			S	Zwann's Avante	AUT
L01	0229			S	Zwann's Finette	FRA
L01	0230			S	Round ale Ohlsen	GER
L01	0231			S	Boordevol	NLD
L01	0232			S	Pfluckerbse	NLD
L01	0233			S	D'Auvergue Ameliore	FRA
L01	0234			S	Desarales
L01	0235			S	Espoir de Gembloux	BEL
L01	0236			S	Fin de La Bievre	FRA
L01	0237			S	Clipper	GBR
L01	0238			S	Meteor	GBR
L01	0239			S	Yates Renown	GBR
L01	0240			S	Clacas Early Dwarf	USA
L01	0241			S	Classed Whats Wanted	USA
L01	0242			S	Profal	NLD
L01	0243			S	Roi de Serpettes	FRA
L01	0244			S	Kujawski Pozny	POL
L01	0245			S	Belyj Melkosemjannyj	SUN
L01	0246			S	Stepnoj	SUN
L01	0247			S	Uladovskij 387	SUN
L01	0248			S	Predchudce	CSK
L01	0249			S	Raman	CSK
L01	0250			S	Podripan	CSK
L01	0251			S	Hrach z Policky	CSK
L01	0252			S	Hrach z Pardubic	CSK
L01	0253			S	Diosecky Express 766	CSK
L01	0254			S	Salzmunder Edelperle	GER
L01	0255			S	CL 37.3	CSK
L01	0256			S	Petit Provencal	GBR
L01	0257			S	Pisum acacium
L01	0258			S	N.sl.34/52	CSK
L01	0259			S	Zeiners kurz und gut	GER
L01	0260			S	Folger	GER
L01	0261			S	Principe Alberto	ITA
L01	0262			S	Dippes gelbe Viktoria	GER
L01	0263			S	Strubes fruhe Viktoria	GER
L01	0264			S	Kaupasiemen	FIN
L01	0265			S	Smaragd	CSK
L01	0266			S	Peragis grune perla	GER
L01	0267			S	Juwel	GER
L01	0268			S	Vorbote	AUT
L01	0269			S	Uladovskij 209	SUN
L01	0270			S	Big Ben	NLD
L01	0271			S	Vares	NLD
L01	0272			S	Rovar	NLD
L01	0273			S	Fertila	NLD
L01	0274			S	Pauli	NLD
L01	0275			S	Kralicky ovalny	CSK
L01	0276			S	Valley	AUS
L01	0277			S	Greenfeast	GBR
L01	0278			S	Viktorija rozovaja 79	SUN
L01	0279			S	Greitukaj	SUN
L01	0280			S	Zazerskij	SUN
L01	0281			S	Piocvert Maroccos	MAR
L01	0282			S	Gelbe Erbse typ 17	GER
L01	0283			S	Jumboka	GER
L01	0284			S	Eminent	GER
L01	0285			S	Weibull orig. Stral	SWE
L01	0286			S	Ollesheimer	GER
L01	0287			S	Muck	GER
L01	0288			S	Pisum sativum	IND
L01	0289			S	Adabelle	IND
L01	0290			S	Guisantes Blancos	IND
L01	0291			S	Cesser	POL
L01	0292			S	Dik-Trom	NLD
L01	0293			S	Hylgro	NLD
L01	0294			S	Flavanda	NLD
L01	0295			S	Uladovskij 303	SUN
L01	0296			S	Dokucaevskij	SUN
L01	0297			S	Cisminskij 39	SUN
L01	0298			S	Krasnoufimskij 70	SUN
L01	0299			S	Kaluzskij 27	SUN
L01	0300			S	Balva	SUN
L01	0301			S	Smolenskij 812	SUN
L01	0302			S	Torsdag III	SWE
L01	0303			S	Gorkovskij 186	SUN
L01	0304			S	Altex	GER
L01	0305			S	Kapital	SWE
L01	0306			S	Puskinskij	SUN
L01	0307			S	Moskovskij 13-572	SUN
L01	0309			S	Uladovskij 7	SUN
L01	0310			S	Bulawa	POL
L01	0311			S	Maipal	GER
L01	0312			S	Maslicnyj	SUN
L01	0313			S	Kolumba	GER
L01	0314			S	Bulba Vereduna	GER
L01	0315			S	Trumpf	GER
L01	0316			S	Fruhe Harzerin	GER
L01	0317			S	Swanhild	GER
L01	0318			S	Pyram	CSK
L01	0319			S	No-570	YUG
L01	0320			S	No-563	YUG
L01	0321			S	No-568	YUG
L01	0322			S	Cisminskij rannyj	SUN
L01	0323			S	Sretinskij	SUN
L01	0324			S	Altajskij	SUN
L01	0325			S	Latvijskij	SUN
L01	0326			S	NO-2124	SUN
L01	0327			S	Tolbuchin	SUN
L01	0328			S	Kazanskij 216	SUN
L01	0329			S	Tadzikskij	SUN
L01	0330			S	Kombajnovyj 584	SUN
L01	0331			S	Irkutskij	SUN
L01	0332			S	Record	HUN
L01	0333			S	Iregi Sarga P-1	HUN
L01	0334			S	Debreceni	HUN
L01	0335			S	Konkursnyj	SUN
L01	0336			S	Ukosnyj	SUN
L01	0337			S	Komsomolec 11	SUN
L01	0338			S	Dneprovskij zelenyj	SUN
L01	0339			S	Stambovyj 71	SUN
L01	0340			S	Viktoria Ukrajinskaja	SUN
L01	0341			S	Anger Blonde	SUN
L01	0342			S	Gorovcyna	SUN
L01	0343			S	Usatyj 5	SUN
L01	0344			S	Felderbsen gelbe	HUN
L01	0345			S	N.sl.Bezuponkovy	CSK
L01	0346			S	Stalibovyj	SUN
L01	0347			S	Sorodaz	HUN
L01	0348			S	No-562	YUG
L01	0349			S	Nemcinovskij 766	SUN
L01	0350			S	Wroclawin	POL
L01	0351			S	Jygeva 174
L01	0352			S	Stambovyj Polokustovij G-07
L01	0353			S	Stambovyj zelenyj	SUN
L01	0354			S	Nuitzen	HUN
L01	0355			S	Fortschritt	HUN
L01	0356			S	Bartel	GER
L01	0357			S	Ambrozija	SUN
L01	0358			S	Vercas	FRA
L01	0359			S	Moskovskij 559	SUN
L01	0360			S	Majskij 220	SUN
L01	0361			S	Asauji I.C.3024	IND
L01	0362			S	Dornburger gelbe	GER
L01	0363			S	Valorart	HUN
L01	0364			S	Ruhmers gelbe Viktoria	GER
L01	0365			S	Mahbis	HUN
L01	0366			S	Marktuberraschung	HUN
L01	0367			S	Chemin Long	FRA
L01	0368			S	Ojo Negro
L01	0369			S	Zloty Olbrzymi	POL
L01	0370			S	Vilmorin III	NLD
L01	0371			S	Remo	FRA
L01	0372			S	Uladovskij 8	SUN
L01	0373			S	Viktoria Kifejto Borso	HUN
L01	0374			S	Cobrette	DNK
L01	0375			S	Pisum sativum 12559	AUS
L01	0376			S	Zolty Borowski K.M.	POL
L01	0377			S	Iregi P-2	HUN
L01	0378			S	Auralia	GER
L01	0379			S	Maro	NLD
L01	0380			S	Laga	NLD
L01	0381			S	Meteor	CSK
L01	0382			S	Voronezskij	SUN
L01	0383			S	Kormovoj 24	SUN
L01	0384			S	Porta	NLD
L01	0385			S	Riitto	DNK
L01	0386			S	Zloty Olbrzymi	POL
L01	0387			S	Gorkovskij 21	SUN
L01	0388			S	Klarus	CSK
L01	0389			S	Uzbeckij 97	SUN
L01	0390			S	JO 06580	FIN
L01	0391			S	JO 06638	FIN
L01	0392			S	Spath Stamm 225	GER
L01	0393			S	Allround	NLD
L01	0394			S	Gintzi	BGR
L01	0395			S	Weitor	SWE
L01	0396			S	Neuga	GER
L01	0397			S	Fridol	NLD
L01	0398			S	Cebeco 59-61-65-6	NLD
L01	0399			S	Cebeco 63118-6711	NLD
L01	0400			S	Cicero	NLD
L01	0401			S	Legio	NLD
L01	0402			S	Angela	NLD
L01	0403			S	Vitallette	NLD
L01	0404			S	Corona Imperial	NLD
L01	0405			S	Karina	NLD
L01	0406			S	Parade	NLD
L01	0407			S	F 59-622	ROM
L01	0408			S	F-53-54	ROM
L01	0409			S	Recette	NLD
L01	0410			S	Nike	POL
L01	0411			S	I.P.3	HUN
L01	0412			S	Hrách z Polska	POL
L01	0413			S	Jubilat	POL
L01	0414			S	Orion	CSK
L01	0415			S	Gome	SWE
L01	0416			S	Lotta	SWE
L01	0417			S	I.C.A.53	ROM
L01	0418			S	Miral	ROM
L01	0419			S	Sixtus	DNK
L01	0420			S	Paloma	NLD
L01	0421			S	Finale	NLD
L01	0422			S	R 4001	POL
L01	0423			S	Ruga	GER
L01	0424			S	Aga	POL
L01	0425			S	Birte	NLD
L01	0426			S	HJA 10960	FIN
L01	0427			S	Ville	FIN
L01	0428			S	Bodil	NLD
L01	0429			S	R 549/64	POL
L01	0430			S	Kaliski	POL
L01	0431			S	Zernogradskij 8	SUN
L01	0432			S	Ulanovskij 68	SUN
L01	0433			S	Novoukrajinskij 50	SUN
L01	0434			S	Wasata	POL
L01	0435			S	Mironovskij 186	SUN
L01	0436			S	I.P.4	HUN
L01	0437			S	R 2082/66	POL
L01	0438			S	Uladovskij 652	SUN
L01	0439			S	Uladovskij Jubilejnyj	SUN
L01	0440			S	Uladovskij Rannespelyj	SUN
L01	0441			S	Lgovskij zelenozernyj	SUN
L01	0442			S	Erbse mit Verbendertene Steng.	GER
L01	0443			S	Mir	GER
L01	0444			S	Century	CAN
L01	0445			S	Karo	POL
L01	0446			S	Erygel	FRA
L01	0447			S	Hybris	FRA
L01	0448			S	Primavil	FRA
L01	0449			S	Ode Danielle	NLD
L01	0450			S	Mutant Leaf Less	POL
L01	0451			S	Stivo	SWE
L01	0452			S	Spiket R.S.	NLD
L01	0453			S	Durana	GER
L01	0454			S	Fertigolt	NLD
L01	0455			S	Green Arrow	GBR
L01	0456			S	Junior	CSK
L01	0457			S	Kestrel	GBR
L01	0458			S	Lumir	CSK
L01	0459			S	Milouin	FRA
L01	0460			S	Properfection	USA
L01	0461			S	Puget	USA
L01	0462			S	Ridcovert	FRA
L01	0463			S	Rivalin	GER
L01	0464			S	Selway	USA
L01	0465			S	Skagit	USA
L01	0466			S	Sultan	USA
L01	0467			S	Venus	GER
L01	0468			S	W.V.162 F	USA
L01	0469			S	Zidovicka Edelperle	CSK
L01	0470			S	Colmo	NLD
L01	0471			S	Harolt	NLD
L01	0472			S	Pluto	NLD
L01	0473			S	Pura	GER
L01	0474			S	Sharpe's 814	GBR
L01	0475			S	Trapper	CAN
L01	0476			S	Triofin	NLD
L01	0477			S	Chancelor	CAN
L01	0478			S	Zazrak z Kelvedonu	CSK
L01	0479			S	Myzar	FRA
L01	0480			S	Beagle	GBR
L01	0481			S	Danielle	NLD
L01	0482			S	Elvira	NLD
L01	0483			S	Eurofin	NLD
L01	0484			S	Finette	FRA
L01	0485			S	Finri	NLD
L01	0486			S	Kompakta	BGR
L01	0487			S	Trintella	NLD
L01	0488			S	Polarette	NLD
L01	0489			S	Plovdivska Perla	BGR
L01	0490			S	Profino	NLD
L01	0491			S	Triton	NLD
L01	0492			S	Uspech 72	BGR
L01	0493			S	Evi	NLD
L01	0494			S	Exzellenz	GER
L01	0495			S	Haco	NLD
L01	0496			S	Mercurio Nr.35	NLD
L01	0497			S	No.810-67	NLD
L01	0498			S	Citrina	GER
L01	0499			S	Ralica	BGR
L01	0500			S	Zornica	BGR
L01	0501			S	Scout	USA
L01	0502			S	Souchet	FRA
L01	0503			S	Triflen
L01	0504			S	Trino	NLD
L01	0505			S	Trinetto	NLD
L01	0506			S	Frogel	FRA
L01	0507			S	Fabina	FRA
L01	0508			S	Allegro	FRA
L01	0509			S	R 280/67	POL
L01	0510			S	Sirena	GER
L01	0511			S	I.P. 6	HUN
L01	0512			S	OBC 817	SUN
L01	0513			S	Akkord	SUN
L01	0514			S	Clamart Trois Gousses	FRA
L01	0515			S	Pisum sativum var. episcopi	GER
L01	0516			S	Twist	GER
L01	0517			S	Nievo	GER
L01	0518			S	Celjabinskij 71	SUN
L01	0519			S	Kazanskij 38	SUN
L01	0520			S	Devulgatum 95/75	SUN
L01	0521			S	Demakroglaukospermum 156/73	SUN
L01	0522			S	F 14810	SUN
L01	0523			S	Satelliet	GER
L01	0524			S	Troika	FRA
L01	0525			S	Kalife	FRA
L01	0526			S	Orus	FRA
L01	0527			S	Starnain	FRA
L01	0528			S	Neosypajuscijsja 1	SUN
L01	0529			S	Deglaukospermum 161	SUN
L01	0530			S	Bohatyr	CSK
L01	0531			S	Zemcug	SUN
L01	0532			S	Lincoln - Mutant	GER
L01	0533			S	Minorvil	FRA
L01	0534			S	Labores	GER
L01	0535			S	Radim	CSK
L01	0536			S	Columba	GER
L01	0537			S	Hertta	FIN
L01	0538			S	JO 2502	FIN
L01	0539			S	JO 9161	FIN
L01	0540			S	Kiri	FIN
L01	0541			S	Mihan	POL
L01	0542			S	Hamil	POL
L01	0543			S	Mistrz	POL
L01	0544			S	T VIII	POL
L01	0545			S	Milewska	POL
L01	0546			S	Mnogojratno neparno peristyj	SUN
L01	0547			S	Vitiaz	SUN
L01	0548			S	N.sl.DE 7	CSK
L01	0549			S	N.sl.DE 29	CSK
L01	0550			S	Emigrant	NLD
L01	0551			S	Fundulea 5354	ROM
L01	0552			S	Heros	POL
L01	0553			S	I.P. 7	HUN
L01	0554			S	MF 3105	ROM
L01	0555			S	Melkosemjanyj	SUN
L01	0556			S	N.sl.PPT.II	CSK
L01	0557			S	Pomorsky zolty	POL
L01	0558			S	N.sl.Stranecka Zhor KR 31	CSK
L01	0559			S	Timirjazevskij	SUN
L01	0560			S	Ujmajori Sarga	HUN
L01	0561			S	Viktorija ranna	SUN
L01	0562			S	Waldmanns Folger	GER
L01	0563			S	Albatros	SUN
L01	0564			S	Era	SUN
L01	0565			S	Markana	GER
L01	0566			S	Ondra	GER
L01	0567			S	Trio	GER
L01	0568			S	WAW 111 12	GER
L01	0569			S	WAW 180 45	GER
L01	0570			S	Skinado	NLD
L01	0571			S	Superette	NLD
L01	0572			S	Vertiroy	NLD
L01	0573			S	Belocerkovskij	SUN
L01	0574			S	Komsomolec	SUN
L01	0575			S	Mansholt's Fluth	NLD
L01	0576			S	Neugatersleben 5099	GER
L01	0577			S	N.sl.DE 104	CSK
L01	0578			S	N.sl.DE 989	CSK
L01	0579			S	N.sl.LU-M	CSK
L01	0580			S	N.sl.HM-1926	CSK
L01	0581			S	N.sl.HS 30-18	CSK
L01	0582			S	N.sl.LU-DIK ZL	CSK
L01	0583			S	N.sl.LU-DK ZELENY	CSK
L01	0584			S	Tolar	CSK
L01	0585			S	N.sl.CH-719	CSK
L01	0586			S	Odeon	CSK
L01	0587			S	I.P.8	HUN
L01	0588			S	PSS 659/76/Gratas	GER
L01	0589			S	Maxi	NLD
L01	0590			S	Miranda	NLD
L01	0591			S	Simo	SWE
L01	0592			S	Vreta	SWE
L01	0593			S	Kujbisevskij	SUN
L01	0594			S	WIA 179	POL
L01	0595			S	Imperial	PRT
L01	0596			S	Kelvedon Wonder	GBR
L01	0597			S	Legenda	POL
L01	0598			S	Opal	POL
L01	0599			S	Sonata	SUN
L01	0600			S	Sum	POL
L01	0601			S	Garfield	USA
L01	0602			S	Tracer	USA
L01	0603			S	Tyrkys	CSK
L01	0604			S	N.sl.HM 1926	CSK
L01	0605			S	N.sl.HC-52	CSK
L01	0606			S	N.sl.LU-FK	CSK
L01	0607			S	N.sl.HS-16502	CSK
L01	0608			S	Dash	NLD
L01	0609			S	Frimento RS	NLD
L01	0610			S	Frostar	NLD
L01	0611			S	Johnsons Freezer	FRA
L01	0612			S	Kobald
L01	0613			S	Lancet	GER
L01	0614			S	Lorina	NLD
L01	0615			S	Lowadis	GER
L01	0616			S	Lowador	GER
L01	0617			S	Orfeo	FRA
L01	0618			S	Prinsa	GER
L01	0619			S	Relavil	GER
L01	0620			S	Ridana	NLD
L01	0621			S	Ridonia	NLD
L01	0622			S	Rurik	NLD
L01	0623			S	Rival	GER
L01	0624			S	Senator	CSK
L01	0625			S	Sprinter	GER
L01	0626			S	Starcovert	FRA
L01	0627			S	Vitalis	NLD
L01	0628			S	Marrow	PRT
L01	0629			S	Ujmajori Korai Viktoria	HUN
L01	0630			S	Koral	POL
L01	0631			S	Aster	POL
L01	0632			S	Corina	ROM
L01	0633			S	Amina	ROM
L01	0634			S	Raport	SUN
L01	0635			S	Uran	SUN
L01	0636			S	Heron	GBR
L01	0637			S	Sentinel	GBR
L01	0638			S	Polaris	GBR
L01	0639			S	Progreta	GBR
L01	0640			S	Sleaford dryard	GBR
L01	0641			S	Menivil	FRA
L01	0642			S	Junak	CSK
L01	0643			S	Amino	FRA
L01	0644			S	Emerald (LU -SIB)	CSK
L01	0645			S	Stehgolt	GER
L01	0646			S	Consort	GBR
L01	0647			S	Topaz	SUN
L01	0648			S	Lenca	CAN
L01	0649			S	Tara	CAN
L01	0650			S	Triumph	CAN
L01	0651			S	Huka	NZL
L01	0652			S	Truzenik	SUN
L01	0653			S	Sarmat	SUN
L01	0654			S	Regent	GBR
L01	0655			S	Conquest	GBR
L01	0656			S	Pontus	DNK
L01	0657			S	Cilla	DNK
L01	0658			S	Belman	DNK
L01	0659			S	Lisette	NLD
L01	0660			S	Frijaune	FRA
L01	0661			S	Belinda	NLD
L01	0662			S	Solara	NLD
L01	0663			S	Alet	SUN
L01	0664			S	Elektron	POL
L01	0665			S	Perkun	POL
L01	0666			S	Ramir	POL
L01	0667			S	Botond	HUN
L01	0668			S	Othello	NLD
L01	0669			S	Proco	NLD
L01	0670			S	Countess	GBR
L01	0671			S	Gitana	NLD
L01	0672			S	Helka	FIN
L01	0673			S	Persocvit	SUN
L01	0674			S	Schobi	GER
L01	0675			S	Nemcinovskij 85	SUN
L01	0676			S	Colt	GBR
L01	0677			S	Karat	POL
L01	0678			S	Heikka	FIN
L01	0679			S	Hemmo	FIN
L01	0680			S	Danto	DNK
L01	0681			S	Progolt	GBR
L01	0682			S	Asta	NLD
L01	0683			S	Margot	NLD
L01	0684			S	Multipod	CSK
L01	0685			S	Ascona	NLD
L01	0686			S	Rigel	SWE
L01	0687			S	Hanak	CSK
L01	0688			S	Romeo	CSK
L01	0689			S	N.sl. HM-2451	CSK
L01	0690			S	N.sl.LU 28B	CSK
L01	0691			S	N.sl.HS 7655	CSK
L01	0692			S	Luzsányi (LU 75)	CSK
L01	0693			S	Olivin	CSK
L01	0694			S	N.sl.HS 8282	CSK
L01	0695			S	Trim (HC 21 81)	CSK
L01	0696			S	N.sl.HM 2637	CSK
L01	0697			S	N.sl.HC 1907	CSK
L01	0698			S	N.sl.HM 630	CSK
L01	0699			S	N.sl.LU 70	CSK
L01	0700			S	N.sl.HM 1682	CSK
L01	0701			S	N.sl.HC 526	CSK
L01	0702			S	Santa	GBR
L01	0703			S	Tipu	CAN
L01	0704			S	Titan	CAN
L01	0705			S	Trille	DNK
L01	0706			S	Madria	NLD
L01	0707			S	Calypso	NLD
L01	0708			S	N.sl.KSI/42-88	SUN
L01	0709			S	N.sl.KSI/7-88	SUN
L01	0710			S	N.sl.KSI/18-88	SUN
L01	0711			S	N.sl.KSI/8-88	SUN
L01	0712			S	Fjord	SWE
L01	0713			S	Ballet	DNK
L01	0714			S	Casino	DNK
L01	0716			S	Folio	GBR
L01	0717			S	Melton	GBR
L01	0718			S	Aist	SUN
L01	0719			S	Orlovskij 3	SUN
L01	0720			S	Echo	GBR
L01	0721			S	Katrin	DNK
L01	0722			S	Szafir	POL
L01	0723			S	Terese	DNK
L01	0724			S	Impala	NLD
L01	0725			S	Princess	GBR
L01	0726			S	Hermes	POL
L01	0727			S	Promar	DNK
L01	0728			S	E-550	SUN
L01	0729			S	E-560	SUN
L01	0730			S	E-420	SUN
L01	0731			S	Leo	GER
L01	0732			S	Janus	CSK
L01	0733			S	N.sl.HM-1743	CSK
L01	0734			S	N.sl.HS-27150	CSK
L01	0735			S	Sobel	DNK
L01	0736			S	Komet	CSK
L01	0737			S	N.sl.LU-164	CSK
L01	0738			S	N.sl.HM-1846	CSK
L01	0739			S	N.sl.HM-1952	CSK
L01	0740			S	M4-9005	DNK
L01	0741			S	M4-9030	DNK
L01	0742			S	M4-9033	DNK
L01	0743			S	M4-9060
L01	0744			S	N.sl.HM-221	CSK
L01	0745			S	N.sl.HM-2706	CSK
L01	0746			S	N.sl.HS-10402	CSK
L01	0747			S	Atol	FRA
L01	0748			S	Froidure	FRA
L01	0749			S	Juno	NLD
L01	0750			S	Montana	NLD
L01	0751			S	Renata	NLD
L01	0752			S	Profi	DNK
L01	0753			S	Sandra	DNK
L01	0754			S	Odin	DNK
L01	0755			S	Mirador	FRA
L01	0756			S	Cambar	FRA
L01	0757			S	Lantra	NLD
L01	0758			S	Carrera	NLD
L01	0759			S	Cebeco 1429/17/	NLD
L01	0760			S	Saturn	CSK
L01	0761			S	Sonet	CSK
L01	0762			S	Adept	CSK
L01	0763			S	Merkur	CSK
L01	0764			S	N.sl.HM-1982/18/	CSK
L01	0765			S	Primus	CSK
L01	0766			S	Pegas	CSK
L01	0767			S	N.sl.HS-65901/20/	CSK
L01	0768			S	Menhir	CSK
L01	0769			S	Dark Skin Perfection	POL
L01	0770			S	Protor	POL
L01	0771			S	Hunter	POL
L01	0772			S	Aldot	POL
L01	0773			S	Avanta	POL
L01	0774			S	Mingomark	POL
L01	0775			S	Charger	POL
L01	0776			S	Jof	POL
L01	0777			S	Alan	CZE
L01	0778			S	Maretta	NLD
L01	0779			S	Mathilde	NLD
L01	0780			S	Pegado
L01	0781			S	Orcado
L01	0782			S	Miragreen
L01	0783			S	Kasino
L01	0784			S	Rampart
L01	0785			S	Waverking
L01	0786			S	Dignity
L01	0787			S	Cennia
L01	0788			S	Midget
L01	0789			S	Waverex
L01	0790			S	Waverplus
L01	0791			S	Bunny
L01	0792			S	Banff
L01	0793			S	P.sat.ssp.asiaticum	POL
L01	0794			S	P.sat.ssp.asiaticum	POL
L01	0795			S	P.sat.ssp.asiaticum	POL
L01	0796			S	P.sat.ssp.asiaticum	POL
L01	0797			S	P.sat.ssp.asiaticum	POL
L01	0798			S	P.sat.ssp.tibetanicum	POL
L01	0799			S	P.sat.ssp.tibetanicum	POL
L01	0800			S	P.sat.ssp.transcaucasicum	POL
L01	0801			S	P.sat.ssp.transcaucasicum	POL
L01	0802			S	P.sat.ssp.transcaucasicum	POL
L01	0803			S	P.sat.ssp.transcaucasicum	POL
L01	0804			S	P.sat.ssp.transcaucasicum	POL
L01	0805			S	P.sat.ssp.transcaucasicum	POL
L01	0806			S	P.sat.ssp.transcaucasicum	POL
L01	0807			S	P.sat.ssp.transcaucasicum	POL
L01	0808			S	Erbi	DEU
L01	0809			S	Libella	DEU
L01	0810			S	Brent
L01	0811			S	Determinantnyj	RUS
L01	0812			S	K 111	RUS
L01	0813			S	Avola	DEU
L01	0814			S	N.sl.SG-L-342	CZE
L01	0815			S	Loto
L01	0816			S	Carrera	NLD
L01	0817			S	N.sl.SG-L-6	CZE
L01	0818			S	N.sl.HM-1636	CZE
L01	0819			S	N.sl.HM-1627	CZE
L01	0820			S	FDP-84 106
L01	0821			S	N.sl.HM-1633	CZE
L01	0822			S	N.sl.HM-1641	CZE
L01	0823			S	Alfetta
L01	0824			S	N.sl.SG-L-7	CZE
L01	0825			S	N.sl.HM-1598	CZE
L01	0826			S	N.sl.HM-1592	CZE
L01	0827			S	Baccara	FRA
L01	0828			S	Sprite	GBR
L01	0829			S	Miracle	SWE
L01	0830			S	Filby	SWE
L01	0831			S	Alderman	GBR
L01	0832			S	Miragreen	GBR
L01	0833			S	Little Marvel
L01	0834			S	Rondo
L01	0835			S	Obelisgue (M4 - 9125)
L01	0836			S	Brandon	GBR
L01	0837			S	Skua	AUT
L01	0838			S	Dryden	GBR
L01	0839			S	Sprut 2	RUS
L01	0840			S	Orlus	RUS
L01	0841			S	Az - 26	RUS
L01	0842			S	Orlovčanin	RUS
L01	0843			S	Orlovčanin 2	RUS
L01	0844			S	Vjatič	RUS
L01	0845			S	Agra	POL
L01	0846			S	SOD 2294	POL
L01	0847			S	Agat	POL
L01	0848			S	Diament	POL
L01	0849			S	Ametyst	POL
L01	0850			S	Mandy	NLD
L01	0851			S	M 2.820.2	NLD
L01	0852			S	A.O. 904	FRA
L01	0853			S	GA 91 PO 10	DNK
L01	0854			S	DP 1059	DNK
L01	0855			S	Maja	NLD
L01	0856			S	GA 92 P 46	DNK
L01	0857			S	Tonus (MH CF 18)	CZE
L01	0858			S	Tenor (M4 - 9238)	CZE
L01	0859			S	Perfection	GBR
L01	0860			S	Marbel	NLD
L01	0861			S	SG-L-2
L01	0862			S	SG-L-8
L01	0863			S	SG-L-14
L01	0864			S	SG-C-15
L01	0865			S	Gotik
L01	0866			S	SG-C-6253
L01	0867			S	s.1468
L01	0868			S	SV - 08323
L01	0869			S	HM - 1383
L01	0870			S	HM - 1390
L01	0871			S	HM - 1414
L01	0872			S	HM - 1415
L01	0873			S	HM - 1453
L01	0874			S	HM - 1489
L01	0875			S	HM - 1620
L01	0876			S	HM - 1647
L01	0877			S	PR 1456
L01	0878			S	Woodcock (PF - 819.01)
L01	0879			S	LPKE 8138/92
L01	0880			S	LPKE 8104/92
L01	0881			S	Clipper (SG-L-1209)
L01	0882			S	SG-L-209
L01	0883			S	US-90-3000	RUS
L01	0884			S	Batrak	RUS
L01	0885			S	LU-203-94	RUS
L01	0886			S	23-193/52
L01	0887			S	LU-213-94	RUS
L01	0888			S	LU-201-94	RUS
L01	0889			S	AZ - 93 - 1964	RUS
L01	0890			S	Grana
L01	0891			S	Brunovský	SVK
L01	0892			S	Hanka	SVK
L01	0893			S	Jadeit	SVK
L01	0894			S	Jantar	SVK
L01	0895			S	Jubolant	SVK
L01	0896			S	Slov. Viktoria 75	SVK
L01	0897			S	Slov. Viktoria 800	SVK
L01	0898			S	Ambrosia
L01	0899			S	Thiram	ESP
L01	0900			S	Zekon	CZE
L01	0901			S	Chantal	FRA
L01	0902			S	L-104-96	RUS
L01	0903			S	L-108-96	RUS
L01	0904			S	L-228-96	RUS
L01	0905			S	L-258-96	RUS
L01	0906			S	L-287-96	RUS
L01	0907			S	č.96-879	RUS
L01	0908			S	Šustrik	RUS
L01	0909			S	HM-6	CZE
L01	0910			S	LU-70	RUS
L01	0911			S	Moravan	CZE
L01	0912			S	Azur
L01	0913			S	Frison
L01	0914			S	Polar
L01	0915			S	Marlene
L01	0916			S	Blue Prusian
L01	0917			S	AGT 1533	RUS
L01	0918			S	AGT 93 1762	RUS
L01	0919			S	Aksajskij	RUS
L01	0920			S	Montego
L01	0921			S	Surprise 60
L01	0922			S	Rex
L01	0923			S	Esa
L01	0924			S	Reuzensuiker
L01	0925			S	Atout
L01	0926			S	Carpo
L01	0927			S	Kamelot	CZE
L01	0928			S	Vera
L01	0929			S	Lentiroi
L01	0930			S	Swing-CEB.1437
L01	0931			S	Scorpio
L01	0932			S	Tropar
L01	0933			S	Cista
L01	0934			S	Vega
L01	0935			S	NGB 3156
L01	0936			S	Melinda
L01	0937			S	Messire
L01	0938			S	Mars
L01	0939			S	Resco
L01	0940			S	Celeste
L01	0941			S	Flagman
L01	0942			S	Insignis
L01	0943			S	Triogem
L01	0944			S	WT - 11 366
L01	0945			S	Imperiala
L01	0946			S	Lord Chancellor
L01	0947			S	Eifel
L01	0948			S	Carneval
L01	0949			S	Eislebener siegerin
L01	0950			S	Fridgit
L01	0951			S	US-93-13281
L01	0952			S	Melfort
L01	0953			S	Highlight	CAN
L01	0954			S	Mozart	CAN
L01	0964			S	Herold	CZE
L01	0965			S	Douroy
L01	0966			S	Vilmorin I.
L01	0967			S	Vilmorin II.
L01	0968			S	Vilmorin VI.
L01	0969			S	Areon C 50
L01	0970			S	Lunearnyj C 50
L01	0971			S	č.489 G
L01	0972			S	Pilot
L01	0973			S	Mexigue
L01	0974			S	Stratagem
L01	0975			S	Chiefltain
L01	0976			S	Olivia
L01	0977			S	Orfac
L01	00984	SWE	Jackpot	S	Jackpot	SWE
L02	0001			S	Klatovska ozima	CSK
L02	0002			S	Klatovska ozima jednobarevna	CSK
L02	0003			S	N.sl.Topolcianky	CSK
L02	0004			S	Spath`s Weihenstephaner	GER
L02	0005			S	Peluska z Pohorelic	CSK
L02	0006			S	N.sl.Sobetice	CSK
L02	0007			S	N.sl.Chlumecka zelena	CSK
L02	0008			S	Chlumecka hneda	CSK
L02	0009			S	Chlumecka fialova	CSK
L02	0010			S	N.sl.Celechovice	CSK
L02	0011			S	N.sl.Viglasska hneda	CSK
L02	0012			S	Viglasska seda	CSK
L02	0013			S	Munchen Weizbluhende	GER
L02	0014			S	Nischkes Riesengebirgs	GER
L02	0015			S	Banater	GER
L02	0016			S	Vostok 55	SUN
L02	0017			S	Uzbetskij 71	SUN
L02	0018			S	Ovatio	BGR
L02	0201			S	Stupicka jarni	CSK
L02	0202			S	Klatovska jarni	CSK
L02	0203			S	N.sl.Balikova	CSK
L02	0204			S	N.sl.Cesky banan	CSK
L02	0205			S	Helena	CSK
L02	0206			S	Kapucin	CSK
L02	0207			S	Kocovska 108	CSK
L02	0208			S	Moravska krajova	CSK
L02	0209			S	N.sl.PR 17,5	CSK
L02	0210			S	N.sl.PR 19,5 P.sat.v.punctatum	CSK
L02	0211			S	N.sl.PR 20,2	CSK
L02	0212			S	N.sl.PR 20,24	CSK
L02	0213			S	N.sl.Prochazkova B	CSK
L02	0214			S	Rudenskaja	SUN
L02	0215			S	N.sl.Ruska Jelinek	SUN
L02	0216			S	Sibirska krajova	SUN
L02	0217			S	Vlasta	CSK
L02	0218			S	Kr PR 19,7 X CL 37,3	CSK
L02	0219			S	Kr PR 19,7 X CL 37,3	CSK
L02	0220			S	Kr PR 19,7 x CL 37.3	CSK
L02	0221			S	Angerner Futtererbse	GER
L02	0222			S	Dragamova	CSK
L02	0223			S	Hohenheimer Rosabluhende	GER
L02	0224			S	Iulich	GER
L02	0225			S	Lucienhofer Wintererbse	GER
L02	0226			S	Mansholt's Kapuciner	NLD
L02	0227			S	Nordost Felderbse	GER
L02	0228			S	Spath's Violetta	GER
L02	0229			S	Strengs Weihenstephaner	GER
L02	0230			S	Svalofs Schrotterbse	SWE
L02	0231			S	Svalofs Soloerbse	SWE
L02	0232			S	Svalofska velkozrnna	SWE
L02	0233			S	Furete 97	GER
L02	0234			S	Purpurviolett Schotige Nero	GER
L02	0235			S	Purpurviolett Schotige Nero	GER
L02	0236			S	Finska	FIN
L02	0237			S	Litevska	SUN
L02	0238			S	Recka	GRC
L02	0239			S	Svycarska obrovska	CHE
L09	0241			S	Pisum elatius
L02	0242			S	Pisum sativum
L02	0243			S	Pisum sativum v. umbellatum
L02	0244			S	Abed Marmor	DNK
L02	0245			S	Weibull's Parvus	SWE
L02	0246			S	Felicitas	GER
L02	0247			S	Tasmanska	DNK
L02	0248			S	Nieznanicka ciemna	POL
L02	0249			S	Nieznanicka Jasna	POL
L02	0250			S	Bello	SWE
L02	0251			S	Brio	SWE
L02	0252			S	Hero
L02	0253			S	Pisum abyssinicum	SWE
L02	0254			S	Schwarzer Riesen	CHE
L02	0255			S	B.II.867	CHE
L02	0256			S	Wachserbse von Prof.Koppert	GER
L02	0257			S	Heyn Rastatt P.183	GER
L02	0258			S	Vilmorin IV	SWE
L02	0259			S	B.I.1439 Kukuli	GER
L02	0260			S	B.I.1416 Landw. Schule Janina	GER
L02	0261			S	H.E.300 aus Gotlingen	IND
L02	0262			S	Coimbra	PRT
L02	0263			S	Palma	FRA
L02	0264			S	Fregero 200	DNK
L02	0265			S	Fregero 210	DNK
L02	0266			S	Baltersbacher	GER
L02	0267			S	Hodinger	GER
L02	0268			S	Kefermarkter	AUT
L02	0269			S	Reichesberger	AUT
L02	0270			S	Falenskaja 42	SUN
L02	0271			S	Pulawska slodka Nr.2	POL
L02	0272			S	Bargkamp	GER
L02	0273			S	Kozieczynska	POL
L02	0274			S	Violetta Rehuherne	GER
L02	0275			S	Weibull 047	SWE
L02	0276			S	Maple Peas	GBR
L02	0277			S	Dun Peas	GBR
L02	0278			S	Graue Erbsen	NLD
L02	0279			S	Kapucin drobnozrnny	CSK
L02	0280			S	N.sl.Kocovce 11	CSK
L02	0281			S	Kapucin belokvety	CSK
L02	0282			S	Minerva	GBR
L02	0283			S	Marathor	GBR
L02	0284			S	Pisello Nano Taccola Weggis	ITA
L02	0285			S	N.F.G. Peluschke	GER
L02	0286			S	Dun	AUS
L02	0287			S	Grey	AUS
L02	0288			S	Weibulls orig. Marma	SWE
L02	0289			S	Vinco	NLD
L02	0290			S	Pomorska	POL
L02	0291			S	Aureool	NLD
L02	0292			S	Eroica	NLD
L02	0293			S	Ivora	NLD
L02	0294			S	Koroza	NLD
L02	0295			S	Sparta
L02	0296			S	Pisum sativum 15860	ETH
L02	0297			S	Pisum arvense	ETH
L02	0298			S	Pisum arvense 15858	ETH
L02	0299			S	N.sl.HxP	CSK
L02	0300			S	Pisum arvense	SUN
L02	0301			S	Falenskij 40	SUN
L02	0302			S	Pjatnickij	SUN
L02	0303			S	Baskirskij	SUN
L02	0304			S	Kubanskij	SUN
L02	0305			S	Tjumenskij	SUN
L02	0306			S	Puskinskij	SUN
L02	0307			S	No.602-19	SUN
L02	0308			S	Peljuska	SUN
L02	0309			S	Spartanec	SUN
L02	0310			S	Krasnojarskij	SUN
L02	0311			S	Pudukat	SUN
L02	0312			S	Gruzinskij	SUN
L02	0313			S	Palestina	SUN
L02	0314			S	Konok Gorbunok	SUN
L02	0315			S	G-602-78	SUN
L02	0316			S	Hero-Stenskaja	SUN
L02	0317			S	Jygeva Kirju	SUN
L02	0318			S	Egroopia
L02	0319			S	Stenskaja	SUN
L02	0320			S	P. elatius (Armenskaja)
L02	0321			S	Luna	CSK
L02	0322			S	Pisum arvense 15859	ETH
L02	0323			S	Dorina	GER
L02	0324			S	Ornamenta	GER
L02	0325			S	Rustica	GER
L02	0326			S	Hoju-Oh-Saya Endo	JPN
L02	0327			S	Kama-Kura Endo	JPN
L02	0328			S	Pisum arvense W-725	AUS
L02	0329			S	Pisum arvense 15248	AUS
L02	0330			S	Pisum arvense 15742	AUS
L02	0331			S	Armjanskij	SUN
L02	0332			S	Alzirskij	DZA
L02	0333			S	Benton	GER
L02	0335			S	Nola II	HUN
L02	0336			S	Imposant	NLD
L02	0337			S	Vesna	CSK
L02	0338			S	Arconia	POL
L02	0339			S	Gastro	NLD
L02	0340			S	Przebedowska Oliwkowa	POL
L02	0341			S	Uzbeckij 87-89	SUN
L02	0342			S	Uzbeckij 110	SUN
L02	0343			S	Friver	FRA
L02	0344			S	Piver	FRA
L02	0345			S	Perdro	FRA
L02	0346			S	Norsup	FRA
L02	0347			S	Gali	FRA
L02	0348			S	Neuga	GER
L02	0349			S	Poneka	GER
L02	0350			S	Mansholt's 783-61	NLD
L02	0351			S	Jubilejni	CSK
L02	0352			S	Pirat	SWE
L02	0353			S	Jelenicki	POL
L02	0354			S	Arvika	CSK
L02	0355			S	Magnificient	HUN
L02	0356			S	Pois Gris D'Hiver	BGR
L02	0357			S	Pois Gris de Printamps	BGR
L02	0358			S	Livia	GER
L02	0359			S	Rosakrone	GER
L02	0360			S	Lysina	DNK
L02	0361			S	Regina	DNK
L02	0362			S	Timo	SWE
L02	0363			S	Trifolium 437	SWE
L02	0364			S	Nadja	GER
L02	0365			S	Dia	CSK
L02	0366			S	Sirius	CSK
L02	0367			S	I.P. 5	HUN
L02	0368			S	Mazurska	POL
L02	0369			S	Nor	GER
L02	0370			S	Rota	SUN
L02	0371			S	Sabine	DNK
L02	0372			S	Artona	ROM
L02	0373			S	Magistra	ROM
L02	0374			S	Bondi	DNK
L02	0375			S	P. sativum convar. speciosum	CSK
L02	0376			S	P. sativum convar. speciosum	CSK
L02	0377			S	Crista	GER
L02	0378			S	Afganistan
L02	0379			S	Media
L02	0380			S	Verno
L02	0381			S	Mongolska	MNG
L02	0383			S	Etiopie /2/	ETH
L02	0384			S	Egypt	EGY
L02	0386			S	Mansholt's Dolfijn	NLD
L02	0387			S	Kirow	SUN
L02	0388			S	Nike	CSK
L02	0389			S	Artturi	FIN
L02	0390			S	JO 7636	FIN
L02	0391			S	N.sl.320/32	CSK
L02	0392			S	Fioletowa	POL
L02	0393			S	N.sl.Char	CSK
L02	0394			S	Gulzower St.	GER
L02	0395			S	Jihoafricky krmny
L02	0396			S	N.sl.Kr.178	CSK
L02	0397			S	N.sl.Kr.240	CSK
L02	0398			S	Muchetskij 1	SUN
L02	0399			S	N.sl.WPxVT	CSK
L02	0400			S	N.sl.HS 4092	CSK
L02	0401			S	Helia	POL
L02	0402			S	Irina	GER
L02	0403			S	Lisa	GER
L02	0404			S	Tyla	CSK
L02	0405			S	Polaris	CSK
L02	0406			S	N.sl.CH 7/79	CSK
L02	0407			S	Golf	GER
L02	0408			S	Dodoni	GRC
L02	0409			S	Olympus	GRC
L02	0410			S	Dundale	AUS
L02	0411			S	Minor	DNK
L02	0412			S	Assas	FRA
L02	0413			S	Whero	NZL
L02	0414			S	Grapis	GER
L02	0415			S	Tigra	GER
L02	0416			S	Fidelia	POL
L02	0417			S	Malinovka	SUN
L02	0418			S	Karpathos	GRC
L02	0419			S	Ithomi	GRC
L02	0420			S	Vermio	GRC
L02	0421			S	EFB 33	ITA
L02	0422			S	Mewa	POL
L02	0423			S	Mige	POL
L02	0424			S	Algera	CSK
L02	0425			S	Ina	CSK
L02	0426			S	Dora	CSK
L02	0427			S	Salome	DNK
L02	0428			S	Paisa	ITA
L02	0429			S	Magnus	GER
L02	0430			S	N.sl. CH-17	CSK
L02	0431			S	N.sl.CH-32	CSK
L02	0432			S	N.sl.HM-117	CSK
L02	0433			S	N.sl.HS-70 267	CSK
L02	0434			S	Livia	CZE
L02	0435			S	Parvus
L02	0436			S	Assas	FRA
L02	0437			S	E-744
L02	0438			S	E-900
L02	0439			S	N.sl.SG-C-3225	CZE
L02	0440			S	Livioletta
L02	0441			S	Orpela	RUS
L02	0442			S	Orel 25	RUS
L02	0443			S	Imposant	GBR
L02	0444			S	Susan	GBR
L02	0445			S	Rey De Los Carouby	GBR
L02	0446			S	Tombola	GBR
L02	0447			S	Caroubel	GBR
L02	0448			S	Blauwschokker	GBR
L02	0449			S	Enka	GBR
L02	0450			S	Waldmanns Futterfrende	DDR
L02	0451			S	Rhea	SVK
L02	0452			S	Geant a Fleur Violette
L02	0453			S	Bitenax	DEU
L02	0454			S	Lucie
L02	0455			S	Mely
L02	0456			S	Vilmorin IV.

## Sheet: wild Pisum
Accession number	eIF4E variant	Species	Origin	Collection
JI255	S	P. sativum subsp. elatius	Turkey	JIC, UK
JI1094	S	P. sativum subsp. elatius	Greece	JIC, UK
JI1096	S	P. sativum subsp. elatius	Greece	JIC, UK
JI800	S	P. sativum subsp. elatius	Lebanon	JIC, UK
JI1703	S	P. sativum subsp. elatius	Turkey	JIC, UK
IPK-2844	S	P. sativum subsp. elatius	Spain	IPK,German
IPK-2853	S	P. sativum subsp. elatius	Hungary	IPK,German
IPK-2854	S	P. sativum subsp. elatius	Hungary	IPK,German
IPK-1675	S	P. sativum subsp. elatius	Italy	IPK,German
IPK-2850	S	P. sativum subsp. elatius	Italy	IPK,German
IPK-7388	S	P. sativum subsp. elatius	France	IPK,German
IPK-2845	S	P. sativum subsp. elatius	Italy,(Palermo)	IPK,German
IPK-7475	S	P. sativum subsp. elatius	Macedonia-Skopje	IPK,German
IPK-4075	S	P. sativum subsp. elatius	Lebanon	IPK,German
ATFC-4285	S	P. sativum subsp. elatius	Marocco	ATC, Australia
ATFC-3273	S	P. sativum subsp. elatius	Morocco	ATC, Australia
PI344537	S	P. sativum subsp. elatius	Italy, Sicily	USDA, USA
JI3155	S	P. sativum subsp. elatius	Turkey	JIC, UK
JI3271	S	P. sativum subsp. elatius	Sardinia, Italy	JIC, UK
IG136599	S	P. sativum subsp. elatius	Turke	ICARDA
PI52465	S	P. sativum subsp. elatius	Syria	USDA, USA
IG119794	S	P. sativum subsp. elatius	Spain	ICARDA
IG111992	S	P. sativum subsp. elatius	Marocco	ICARDA
JI1095	S	P. sativum subsp. elatius	Greece	JIC, UK
VIR4014	S	P. sativum subsp. elatius	Azerbaijan	VIR
VIR2521	S	P. sativum subsp. elatius	Palestine	VIR
JI2629	S	P. sativum subsp. elatius	Crimea	JIC, UK
JI2055	S	P. sativum subsp. elatius	Italy	JIC, UK
JI3553	S	P. sativum subsp. elatius	France	JIC, UK
WL2123	S	P. sativum subsp. elatius	Jordan	Wiatrovo, Poland
VIR1851	S	P. sativum subsp. elatius	Georgia	VIR
PI52596	S	P. sativum subsp. elatius	Algeria	USDA, USA
IG52414-1	S	P. sativum subsp. elatius	Syria	ICARDA
IG52414-2	S	P. sativum subsp. elatius	Syria	ICARDA
JI2630	S	P. sativum subsp. elatius	Crimea	JIC, UK
ATFC-6658	S	P. sativum subsp. elatius	Armenia	ATC, Australia
W6-10925	S	P. sativum subsp. elatius	Bulgaria	USDA, USA
PI52532	S	P. sativum subsp. elatius	Turkey, Izmir	USDA, USA
VIR7327	S	P. sativum subsp. elatius	Turkey	VIR
JI1091	S	P. sativum subsp. elatius	Spain	JIC, UK
712 (L100)	S	P. sativum subsp. elatius	Israel	VIR
WL 805	S	P. sativum subsp. elatius	Turkey	Wiatrovo, Poland
P 016	S	P. sativum subsp. elatius	Turkey	VIR
JI3557	S	P. sativum subsp. elatius	Portugal	JIC, UK
W6-4009	S	P. sativum subsp. elatius	Armenia	USDA, USA
W6-26109	S	P. sativum subsp. elatius	Georgia	USDA, USA
W6-10925	S	P. sativum subsp. elatius	Bulgaria	USDA, USA
PIS 2847	S	P. sativum subsp. elatius	Russia	IPK,German
JI3558	S	P. sativum subsp. elatius	Spain	JIC, UK
BGE 022216	S	P. sativum subsp. elatius	Spain	Bulgaria
JI3151	S	P. sativum subsp. elatius	Turkey	JIC, UK
JI1703	S	P. sativum subsp. elatius	Turkey	JIC, UK
JI3149	S	P. sativum subsp. elatius	Turkey	JIC, UK
JI3147	S	P. sativum subsp. elatius	Turkey	JIC, UK
IG 52532	S	P. sativum subsp. elatius	Turkey	ICARDA
IG 52531	S	P. sativum subsp. elatius	Turkey	ICARDA
IG 52530	S	P. sativum subsp. elatius	Turkey	ICARDA
IG 52524	S	P. sativum subsp. elatius	Turkey	ICARDA
IG 52520	S	P. sativum subsp. elatius	Turkey	ICARDA
IG 52517	S	P. sativum subsp. elatius	Turkey	ICARDA
IG 52508	S	P. sativum subsp. elatius	Turkey	ICARDA
IG 52507	S	P. sativum subsp. elatius	Turkey	ICARDA
IG 52506	S	P. sativum subsp. elatius	Turkey	ICARDA
IG 52414	S	P. sativum subsp. elatius	Syria	ICARDA
IG 136598	S	P. sativum subsp. elatius	Turkey	ICARDA
IG 52594	S	P. sativum subsp. elatius	Algeria	ICARDA
IG 52595	S	P. sativum subsp. elatius	Algeria	ICARDA
IG 52596	S	P. sativum subsp. elatius	Algeria	ICARDA
IG 108291	S	P. sativum subsp. elatius	Tunisia	ICARDA
IG 111183	S	P. sativum subsp. elatius	Tunisia	ICARDA
IG 52445	S	P. sativum subsp. elatius	Tunisia	ICARDA
IG 65050	S	P. sativum subsp. elatius	Iran	ICARDA
IG 52560	S	P. sativum subsp. elatius	Jordan	ICARDA
IG 52545	S	P. sativum subsp. elatius	Jordan	ICARDA
W6 26127	S	P. sativum subsp. elatius	Georgia	USDA, USA
W6 26112	S	P. sativum subsp. elatius	Georgia	USDA, USA
PI 639963	S	P. sativum subsp. elatius	Bulgaria	USDA, USA
PI 344013	S	P. sativum subsp. elatius	Greece	USDA, USA
PI 344012	S	P. sativum subsp. elatius	Greece	USDA, USA
PI 344011	S	P. sativum subsp. elatius	Greece	USDA, USA
PI 344010	S	P. sativum subsp. elatius	Greece	USDA, USA
PI 344009	S	P. sativum subsp. elatius	Greece	USDA, USA
PI 344008	S	P. sativum subsp. elatius	Greece	USDA, USA
PI 344007	S	P. sativum subsp. elatius	Greece	USDA, USA
PI 344006	S	P. sativum subsp. elatius	Greece	USDA, USA
PI 344005	S	P. sativum subsp. elatius	Greece	USDA, USA
IG52564	S	P. sativum subsp. sativum	Jordan, Irbice	ICARDA
IG65050	S	P. sativum subsp. sativum	Iran	ICARDA
108291	S	P. sativum subsp. sativum	Tunisia	JIC, UK
JI1794	S	P. sativum subsp. sativum	Israel, Golan	JIC, UK
PI49238	S	P. sativum subsp. sativum	Lebanon	USDA, USA
IG52393	S	P. sativum subsp. sativum	Syria	ICARDA
ATFC6927	S	P. sativum subsp. sativum	China	ATC, Australia
JI241	S	P. sativum subsp. sativum	Israel	JIC, UK
IG 52503	S	P. sativum subsp. sativum	Turkey	ICARDA
IG 52502	S	P. sativum subsp. sativum	Turkey	ICARDA
IG 52499	S	P. sativum subsp. sativum	Turkey	ICARDA
IG 52465	S	P. sativum subsp. sativum	Syria	ICARDA
IG 52593	S	P. sativum subsp. sativum	Algeria	ICARDA
W6 2107	S	P. sativum subsp. sativum	Turkey, Sirt	USDA, USA
W6 2101	S	P. sativum subsp. sativum	Turkey, Sirt	USDA, USA
W6 2044	S	P. sativum subsp. sativum	Turkey, Mardin	USDA, USA
PI 639964	S	P. sativum subsp. sativum	Bulgaria	USDA, USA
L010793	S	P.sat.ssp.asiaticum	Asia	CzNPC, Czech
L010800	S	P.sat.ssp.transcaucasicum	Asia	CzNPC, Czech
Wt-1	X	Pisum abyssinicum	Ethiopia	Wiatrovo, Poland
Wt-2	X	Pisum abyssinicum	Ethiopia	Wiatrovo, Poland
Wt-3	X	Pisum abyssinicum	Ethiopia	Wiatrovo, Poland
Wt-4	X	Pisum abyssinicum	Ethiopia	Wiatrovo, Poland
Wt-5	X	Pisum abyssinicum	Ethiopia	Wiatrovo, Poland
Wt-6	X	Pisum abyssinicum	Ethiopia	Wiatrovo, Poland
Wt-7	X	Pisum abyssinicum	Ethiopia	Wiatrovo, Poland
Wt-8	X	Pisum abyssinicum	Ethiopia	Wiatrovo, Poland
Wt-9	X	Pisum abyssinicum	Ethiopia	Wiatrovo, Poland
Wt-10	X	Pisum abyssinicum	Ethiopia	Wiatrovo, Poland
Wt-11	X	Pisum abyssinicum	Ethiopia	Wiatrovo, Poland
Wt-12	X	Pisum abyssinicum	Ethiopia	Wiatrovo, Poland
Wt-13	X	Pisum abyssinicum	Ethiopia	Wiatrovo, Poland
Wt-14	X	Pisum abyssinicum	Ethiopia	Wiatrovo, Poland
Wt-15	X	Pisum abyssinicum	Ethiopia	Wiatrovo, Poland
Wt-16	X	Pisum abyssinicum	Ethiopia	Wiatrovo, Poland
Wt-17	X	Pisum abyssinicum	Ethiopia	Wiatrovo, Poland
Wt-18	X	Pisum abyssinicum	Ethiopia	Wiatrovo, Poland
Wt-19	X	Pisum abyssinicum	Ethiopia	Wiatrovo, Poland
Wt-20	X	Pisum abyssinicum	Ethiopia	Wiatrovo, Poland
Wt-21	X	Pisum abyssinicum	Ethiopia	Wiatrovo, Poland
Wt-22	X	Pisum abyssinicum	Ethiopia	Wiatrovo, Poland
Wt-23	X	Pisum abyssinicum	Ethiopia	Wiatrovo, Poland
Wt-24	X	Pisum abyssinicum	Ethiopia	Wiatrovo, Poland
Wt-25	X	Pisum abyssinicum	Ethiopia	Wiatrovo, Poland
Wt-26	X	Pisum abyssinicum	Ethiopia	Wiatrovo, Poland
JI225	X	Pisum abyssinicum	Ethiopia	JIC, UK
JI226	X	Pisum abyssinicum	Ethiopia	JIC, UK
JI227	X	Pisum abyssinicum	Ethiopia	JIC, UK
JI1458	X	Pisum abyssinicum	Ethiopia	JIC, UK
JI130	X	Pisum abyssinicum	Ethiopia	JIC, UK
JI2	X	Pisum abyssinicum	Ethiopia	JIC, UK
JI1006	X	Pisum fulvum	Israel	JIC, UK
JI1008	X	Pisum fulvum	Israel	JIC, UK
JI1012	X	Pisum fulvum	Israel	JIC, UK
JI1392	X	Pisum fulvum	Israel	JIC, UK
JI849	X	Pisum fulvum	Israel	JIC, UK
JI1010	X	Pisum fulvum	Israel	JIC, UK
JI1007	X	Pisum fulvum	Israel	JIC, UK
JI1009	X	Pisum fulvum	Israel	JIC, UK
JI1011	X	Pisum fulvum	Turkey	JIC, UK
		Remarks: x is extra size band
